# Supplementary material for: New Insights into the Ecology and Physiology of Methanomassiliicoccales from Terrestrial and Aquatic Environments
Source: PubMed Central journal article supplement (PMC7824343; doi:10.3390/microorganisms9010030), 2020-12-24
Supplement: microorganisms-09-00030-s001.pdf [file microorganisms-09-00030-s001.pdf]

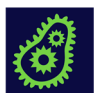

Supplementary Material

# New insights into the ecology and physiology of *Methanomassiliicoccales* from terrestrial and aquatic environments.

Marc Cozannet<sup>1</sup>, Guillaume Borrel<sup>2</sup>, Erwan Roussel<sup>1</sup>, Yann Moalic<sup>1</sup>, Maxime Allieux<sup>1</sup>, Amandine Sanvoisin<sup>1</sup>, Laurent Toffin<sup>1</sup> & Karine Alain<sup>1,\*</sup>

- <sup>1</sup> Univ Brest, CNRS, IFREMER, IRP 1211 MicrobSea, Laboratoire de Microbiologie des Environnements Extrêmes LM2E, UMR 6197, IUEM, Rue Dumont d'Urville, F-29280 Plouzané, France; Marc.Cozannet@univ-brest.fr (M.C.); Erwan.Roussel@ifremer.fr (E.R.); Yann.Moalic@univ-brest.fr (Y.M.); Maxime.Allieux@univ-brest.fr (M.A.); Laurent.Toffin@ifremer.fr (L.T.); Karine.Alain@univ-brest.fr (K.A.)
- <sup>2</sup> Department of Microbiology, Unit Evolutionary Biology of the Microbial Cell, Institut Pasteur, Paris, France; guillaume.borrel@pasteur.fr (G.B.)
- \* Correspondence: Karine.Alain@univ-brest.fr; Tel.: +33-0298-4988-53

Received: date; Accepted: date; Published: date

## Supplementary Text

### Text S1. Pre-metabarcoding screening

#### Section 1.1. Total DNA extraction

In order to search for natural samples containing *Methanomassiliicoccales*, an initial large-scale molecular screening was carried out on a wide range of anoxic samples (86 in total).

DNA extractions were carried out in triplicate with a protocol adapted to each type of matrix. Two types of DNA extraction procedures have been implemented depending on the nature of the matrices: (i) Nucleic acids were extracted from sediments, mud and peatland soils by combining a mechanical lysis step to a commercial DNA extraction kit for soil type matrices. The first extraction step consisted of mechanical cell lysis of 0.5 g of sample by bead-beating (5500 rpm, 30 s), using the Precellys 24<sup>®</sup> tissue homogenizer (Bertin instruments, France). Then, the FastDNA<sup>™</sup> SPIN Kit for Soil (MP Biomedicals, Thermo Fisher Scientific) was used following manufacturer's instructions. In order to optimize the precipitation of small amounts of DNA and to improve extraction yields, 10 µl of linear acrylamide (5 mg ml<sup>-1</sup>, Ambion, Thermo Fisher Scientific) was added to the sample. After a chemical lysis step, DNA was purified on a silica column and eluted in 50 µl of DES buffer. (ii) Nucleic acids were extracted from liquid samples (brines, lake waters, geothermal hot spring fluids) using a phenol/chloroform/isoamyl alcohol (25/24/1; pH 8.0; Sigma-Aldrich) (PCI) DNA extraction protocol. Fifteen ml of sample were first centrifuged (20 min, 13 000 rpm, 4 °C) to pellet the cells. Cell pellets were then resuspended in 1 ml TE-Na-1X lysis buffer, with 10 µl of linear acrylamide (5 mg ml<sup>-1</sup>). Cell lysis and deproteinization were performed by addition of 100 µl sarkosyl (10% w/v), 100 µl sodium dodecyl sulfate (SDS; 10% w/v) and 20 µl proteinase K (20 mg ml<sup>-1</sup>, Thermo Fisher Scientific, Illkirch, France), followed by a 3h incubation at 55 °C in a water bath. After incubation, 1 volume of PCI was added to 1 volume of lysis solution, solutions were mixed by gentle inversion and then centrifuged (15 min, 13 000 rpm, 4 °C) to extract the nucleic acids. After centrifugation, the upper aqueous phase was collected and extracted with chloroform. After centrifugation (15 min, 13 000 rpm, 4 °C), the upper aqueous phase was collected and nucleic acid precipitation was carried out by addition of 40 µl sodium acetate (3 M, pH 5.2) and 0.8 volume of isopropanol. In order to favour nucleic acids precipitation, each tube was placed 30 min at -80 °C. After thawing at room temperature, the solutions were centrifuged (20 min, 13 000 rpm, 4 °C) to collect DNA pellets and these were washed with 70% (v/v) ethanol. Finally, DNA were resuspended in 50 µl TE-1X buffer.

## Section 1.2. PCR amplifications of regions of 16S rRNA gene sequences with *Methanomassiliicoccales*-specific primers

In order to select samples containing *Methanomassiliicoccales*, a 478 bp fragment of the V4 region of *Methanomassiliicoccales* 16S rRNA gene was selectively amplified using primers AS1\_Fw (5'-CAG CAG TCG CGA AAA CTT C-3') [1] and AS2\_Rv mod. (5'-AAC AAC TTC TCT CCG GCA CT-3') (this study) (this primer corresponds to a modified version of the AS2 primer described elsewhere [1]). These *Methanomassiliicoccales*-targeting primers specificity were retested *in silico* using online software's ProbeMatch (<https://rdp.cme.msu.edu/probematch/search.jsp>) (RDP2, ribosomal database project 2) and TestPrime (<https://www.arb-silva.de/search/testprime/>) (against the 132 version of the SILVA SSU database). This primer pair covered 87% of the diversity of correctly affiliated *Methanomassiliicoccales* sequences of the SILVA 138 SSU database without any mismatch, and 100% of the *Methanomassiliicoccales* sequences by allowing 1 mismatch. *In vitro* analyses were also performed by using genomic DNA from *Methanomassiliicoccus luminyensis* B10<sup>T</sup> (DSM 25720) strain (positive control) and two negative controls: *Methanococcoides vulcani* SLH33<sup>T</sup> (DSM 26966) strain (a methylophilic methanogenic *Archaea* belonging to the *Methanosarcinales* [2] and *Thermococcus* sp. strain (an archaeal species belonging to the non-methanogenic order *Thermococcales*) [3], respectively. Positive amplifications were obtained only when using *M. luminyensis* genomic DNA as a template. The reaction mixtures used for DNA amplifications, carried out in triplicates, contained, for a volume of 25 µl (for one reaction): 15.86 µl molecular biology grade water, 5 µl buffer (10× GreenGoTaq<sup>®</sup> buffer, Promega, USA), 1 µl of each primer (at 10 mM), 0.5 µl dNTPs (10 mM of each primer), 0.12 µl GoTaq<sup>®</sup> G2 DNA Polymerase (5 U µl<sup>-1</sup>, Promega), 0.12 µl Bovine Serum Albumin Acetylated (BSA, 10 mg ml<sup>-1</sup>, Promega), 0.4 µl MgCl<sub>2</sub> (10 mM, Thermo Fisher Scientific™) and 1 µl of DNA template. Amplifications were performed in a PCR apparatus (GeneAmp<sup>®</sup>, PCR System 9700, Thermo Fisher Scientific™) using the following cycling program: 95 °C for 5 min, 34 to 40 cycles of 95 °C for 1 min, 60 °C for 1 min, 72 °C for 1 min, and a final extension period of 6 min at 72 °C. Genomic DNA solutions from *Methanomassiliicoccus luminyensis* were used as positive controls. Amplicons quality were then checked by electrophoretic migration. Twenty-two samples that led to a positive amplification of the sequences of interest (in ≥ 2 replicates) were selected for further investigation.

### Text S2. Origin and detailed description of environmental samples

The eighty-six samples collected from anoxic zones of various ecosystems (marine sediments, deep-sea hydrothermal vents, marine pockmarks, submarine mud volcano, deep-sea hypersaline anoxic brine, peatland soils, lakes, hot springs, river sediments) from 40 worldwide locations, for the pre-screening stage are described in Table A1.

The 22 samples used for an in-depth study were the following ones: (i) five samples, collected in January 2017, were originating from the ombrotrophic Mougau peatland area (Brittany, France). They consisted of four peatland soil samples (MOUG1–MOUG4) collected in January 2017, in the peat surface layer (0–10 cm), and one sediment sample from a freshwater stream (MOUG5) collected in the upper sediment (5–10 cm); (ii) four samples were collected from the center of the deep-sea methane-emitting Håkon Mosby mud volcano, located at 1280 m water depth, in the Barents Sea (Arctic Ocean), during the 2009 ARK-XXIV/2 (PS74) oceanographic cruise. Sedimentary horizons selected after the pre-screening stage were the 0–1 cm (HM1), 1–6 cm (HM2) and 6–11 cm (HM3) sediments from the PS74/168 core, and the 1–6 cm (HM4) surface layer sediments from the PS74/189 core; (iii) three anoxic samples were collected in December 2018, in the water column of the meromictic crater Lake Pavin (Auvergne, France) at 60, 70 and 80 m water depth corresponding, respectively, to the mixolimnion-chemocline interface (PAV60), the chemocline-subchemocline interface (PAV70) and the subchemocline water (PAV80) [4]; (iv) one geothermal hot spring sediment sample was collected, in November 2013, from the Xiada reservoir of the Xiamen botanical garden (China) (XIA); (v) one geothermal spring sediment sample was taken from an ephemeral hot spring located in the tidal sway zone on the beach called Feu de Joie, at the Kerguelen islands (Kerguelen

archipelago, France, Indian Ocean) (KERG), in December 2016; (vi) two samples were originating from the athalassic (MgCl<sub>2</sub>-rich) deep-sea hypersaline anoxic brine (DHAB) Kryos, in the Mediterranean Sea. They were respectively collected from layers at 150 g l<sup>-1</sup> salts (mainly MgCl<sub>2</sub>) (KRY150) and 238 g l<sup>-1</sup> (mainly MgCl<sub>2</sub>) (KRY238) [5], in May 2016; (vii) three sediments samples were collected in a pockmark field during the 2015 PAMELA-MOZ4 oceanographic survey in the Mozambique Channel (off the Madagascar island). Those samples consisted in the first 2–4, 4–6 and 6–11 cm layers of the CSF4 sediment cores referenced as MOZ1, MOZ2 and MOZ3, respectively; (viii) one surficial marine sediment sample (15–20 cm) was collected from the Dourduff-en-Mer marine bay (DOUR), in February 2017, on the coast of Brittany (English Channel, France); (ix) one deep-sea sediment sample was collected from the South West Indian Ocean (COMRA) during the April 2015 COMRA oceanographic cruise; (x) finally, a freshwater sediment sample was taken from a stream (0–10 cm) feeding the coastal river Penfeld in February 2017 (PENF) (Brittany, France). Given that the ultimate goal of this study was to grow *Methanomassiliicoccales*, all the investigated samples were stored at 4 °C.

### Text S3. Total DNA extraction for metabarcoding screening

The standardized DNA extraction protocol which was used on the 22 samples selected for an in-depth characterization combined mechanical and chemical lysis. It was applied in triplicate to each sample (+ one negative control). In summary, each DNA extraction was performed onto 0.5 g of environmental matrix. A mechanical lysis of the sample was first carried out by bead-beating (5000 rpm, 15 s), using the Precellys 24<sup>®</sup> tissue homogenizer (Bertin instruments, France), in a FastDNA<sup>®</sup> Lysing Matrix tube E (FastDNA<sup>®</sup> SPIN kit for soil, MP Biomedicals) containing 1 ml of TE-Na-1× lysis buffer (100 mM Tris, 50 mM EDTA, 100 mM NaCl, pH 8.0) in addition to the sample. Then, the lysate supernatants were subjected to a DNA extraction protocol combining chemical and enzymatic lysis procedures, and a classical phenol/chloroform/isoamyl alcohol (PCI: 25/24/1; pH 8.0) extraction of nucleic acids, as described elsewhere [6]. Nucleic acids were then precipitated with 0.8 volumes of icecold isopropanol, in the presence of 400 µl Na-acetate (3M) and 5 µl linear acrylamide (Ambion, Applied Biosystems). Elution was performed in 40 µl EB buffer (Qiagen) before pooling. DNA extractions from enrichment cultures were performed as described above, except that the mechanical lysis stage has been omitted. For these extracts, elution was performed in 100 µl EB buffer.

Nucleic acid solution quality was determined using the NanoDrop<sup>™</sup> 8000 (Thermo Scientific) spectrophotometer. Double-strand DNA concentration was measured using the kit Quantifluor<sup>™</sup> dsDNA system (Promega), following the manufacturer's instructions.

### Text S4. Details of the barcoding and the phylogenetic analyses

#### Section 4.1. FASTQ generation

Amplicons from bulk samples and enrichment cultures were generated by the company Molecular Research-MrDNA (Shallowater, Texas, USA), using the Illumina MiSeq (2 × 300 bp, paired-end reads) technology, with the kits and according to the manufacturer's instructions. FASTQ were generated using the "Combine FASTA and QUAL into FASTQ (Galaxy v. 1.0.1)" [7] tool on the FROGS pipeline. FASTA and Quality Score files were joined according to a mapping file and the ASCII force quality score to create a single FASTQ block for each read. The quality of raw sequence data were then checked using the "FastQC Read Quality reports" (v. 0.11.4) tool (<http://www.bioinformatics.babraham.ac.uk/projects/fastqc/>).

#### Section 4.2. OTU generation and comparison

Once data from enrichment cultures were generated by the company and in order to facilitate OTU comparison between prokaryotic diversity in bulk samples and in enrichment cultures, raw FASTQ files from both sequencing runs were merged into a unique file before processing as described

in 2.3. *Sequencing and sequence analysis* (main manuscript). This resulted on the generation of a unique BIOM file comprising representative 16S rRNA OTU abundance, and taxonomy into each samples.

#### Section 4.3. Consensus sequences workflow

Extraction of potential reagent contaminants and normalization of representative 16S rRNA gene OTUs were performed using the R studio program (v. 1.3.5001), the phyloseq (v. 1.28.0 R), the decontam (v. 1.4.0) and the metagenomSeq (v. 1.26.3) packages. As the metadata between the bulk samples and in the enrichment cultures were different, two distinct sequence treatments were performed from the previously generated single BIOM file. The BIOM files were converted to a .csv file before being implemented in the R program. Our scripts were based on workflows described elsewhere (<https://bioconductor.org/help/course-materials/2017/BioC2017/Day1/Workshops/Microbiome/MicrobiomeWorkflowII.html> and [https://benjjneb.github.io/decontam/vignettes/decontam\\_intro.html](https://benjjneb.github.io/decontam/vignettes/decontam_intro.html), respectively). Workflow used to decontaminate and normalize 16S rRNA gene sequences representatives of the OTUs is listed below. Additional information about the script is preceded by a “#”.

##### Step 1. Loading tables into R program

```
setwd("File_path")
OTUtable <- read.table("OTUs_file.csv",header = T, row.names = 1, sep = ";")
Metadata <- read.table("Bulk_Metadata_file.csv", header = T, row.names = 1, sep = ";")
Taxo <- read.table("Taxonomy_Table_file.csv", header = T, row.names = 1, sep = ";")
Taxo <- as.matrix(Taxo)
```

##### Step 2. Create a Phyloseq object

```
library(phyloseq)
OTU <- otu_table(OTUtable, taxa_are_rows = TRUE)
Meta <- sample_data(Metadata)
Tax <- tax_table(Taxo)
Phymatrice <- phyloseq(OTU, Meta, Tax)
Phymatrice
#Here, "Phymatrice" refers to the Phyloseq object.
```

##### Step 3. Remove unwanted taxa

Potential contaminant taxa such as *Chloroplast*, *Mitochondria*, *Eukaryota* or unclassified Kingdom level taxa are removed.

```
subset_taxa(Phymatrice, Order!="Chloroplast" )
Phy <- subset_taxa(Phymatrice, Order!="Chloroplast" )
Phy2 <- subset_taxa(Phy, Kingdom!="Unclassified" )
Phy3 <- subset_taxa(Phy2, Family!="Mitochondria" )
Phymatrice <- subset_taxa(Phy3, Kingdom!="Eukaryota" )
Phymatrice
```

##### Step 4. Sequence decontamination using the "Decontam" tool

```
# Library size inspection
library(ggplot2)
library(decontam)
df <- as.data.frame(sample_data(Phymatrice))
df$LibrarySize <- sample_sums(Phymatrice)
df <- df[order(df$LibrarySize),]
df$Index <- seq(nrow(df))
ggplot(data=df, aes(x=Index, y=LibrarySize, color=Sample_or_Control)) + geom_point()
```

Contaminant identification – Frequency approach, based on Picogreen technology DNA assay.

```
contamdf.freq <- isContaminant(Phymatrice, method="frequency", conc="quant_reading")
head(contamdf.freq)
table(contamdf.freq$contaminant)
head(which(contamdf.freq$contaminant))
plot_frequency(Phymatrice, taxa_names(Phymatrice)[c(1,3)], conc="quant_reading") + xlab("DNA
Concentration (PicoGreen fluorescent intensity)")
set.seed(100)
plot_frequency(Phymatrice, taxa_names(Phymatrice)[sample(which(contamdf.freq$contaminant),3)
], conc="quant_reading") + xlab("DNA Concentration (PicoGreen fluorescent intensity)")
Phymatrice.noncontam <- prune_taxa(!contamdf.freq$contaminant, Phymatrice)
Phymatrice.noncontam = filter_taxa(Phymatrice.noncontam, function(x) sum(x) > 0, TRUE)
Phymatrice <- Phymatrice.noncontam
```

#### Step 5. Data normalisation using the metagenomeSeq tool

```
library(Biostings)
library(ggplot2) + theme_set(theme_bw())
library("metagenomeSeq")
all_MR <- phyloseq_to_metagenomeSeq(Phymatrice)
all_MR_nor <- cumNorm(all_MR)
all_df_nor <- MRcounts(all_MR_nor, norm = T)
Phymatrice_norm <- phyloseq(otu_table(all_df_nor, taxa_are_rows = TRUE), tax_table(Phymatrice),
sample_data(Phymatrice))
rm(all_MR, all_MR_nor)
Phymatrice_norm #Normalised phyloseq object
```

#### Step 6. Export OTU, taxonomy and metadata tables

#Exporting OTU, taxonomy and metadata tables to separate .csv files could be useful for further investigations.

```
library(microbiome)
TaxoMarcEnrich = write_phyloseq(Phymatrice_norm, "TAXONOMY")
TaxoMarcEnrich = write_phyloseq(Phymatrice_norm, "OTU")
TaxoMarcEnrich = write_phyloseq(Phymatrice_norm, "METADATA")
```

#### *Section 4.4. Ecological Network analysis*

Beta-diversity between bulks samples was assessed by Network analysis using a Bray-Curtis index, as ecological distance. First, the distance matrix was computed with a script Perl, then the percolation threshold was computed (see methods section) and the Gephi was used to visualize it.

#### *Section 4.5. Phylogenetic analyses of Methanomassiliicoccales OTUs*

All 16S rRNA gene sequences representative of *Methanomassiliicoccales* OTUs, generated from metabarcoding and metagenomic analyses, have been aligned and refined manually with other *Methanomassiliicoccales* sequences from both *Methanomassiliicoccales* clades published elsewhere [8–15] using MUSCLE (with 16 iterations maximum) and GBlocks (without contiguous non-conserved positions). Sequences affiliated to various methanogen lineages and sequences belonging to the clades RG8 and *Ca. 'Thermoplasmatota'* were also added to the dataset, and used as outgroup. The BIONJ method [16] was then applied on sequences with the modifications of Jukes and Cantor and using 1000 resampling bootstrap replicates to generate the final dendrogram.

### Text S5. Media composition

Enrichment cultures targeting *Methanomassiliicoccales* were performed in a medium based on previously published recipes [8,17–19] and [https://www.dsmz.de/microorganisms/medium/pdf/DSMZ\\_Medium141.pdf](https://www.dsmz.de/microorganisms/medium/pdf/DSMZ_Medium141.pdf)) that included a basal medium described in the body of the text, and a number of additives (fatty acids solution, hemin solution, selenite-tungstate solution, polyvitamin solution, K3 vitamin solution and coenzyme M solution) described in this section.

The fatty-acid solution contained, per litre: 25 g valeric acid, 25 g isovaleric acid, 25 g 2-methylbutanoic acid and 25 g isobutyric acid. Its pH was adjusted to 7.5 with concentrated NaOH. It was then filter-sterilized (pore-size,  $\emptyset$  0.2  $\mu\text{m}$ ), placed under a  $\text{N}_2$  gas phase, and stored at 4 °C.

The porcine hemin solution was prepared as follows, for 100 ml: 50 mg porcine hemin (PanReac AppliChem, Barcelona, Spain) was dissolved into 1 ml NaOH before adjusting the volume to 100 ml with distilled water. The solution was then sterilized by filtration (pore-size,  $\emptyset$  0.2  $\mu\text{m}$ ) before to be stored at 4 °C, under a  $\text{N}_2$  atmosphere.

The tungstate-selenite solution contained, per litre: 0.5 g NaOH, 3 mg  $\text{Na}_2\text{SeO}_3 \cdot 5\text{H}_2\text{O}$ , 4 mg  $\text{NaWO}_4 \cdot 2\text{H}_2\text{O}$ . Solution was sterilized by autoclaving and stored under  $\text{N}_2$  at 4 °C, until use.

The polyvitamin solution (from the DSMZ141 medium) contained, per litre: 2 mg biotin, 2 mg folic acid, 10 mg pyridoxine-HCl, 5 mg thiamine-HCl  $\cdot 2\text{H}_2\text{O}$ , 5 mg riboflavin, 5 mg nicotinic acid, 5 mg D-Ca-pantothenate, 0.10 mg cobalamin (= vitamin B12), 5 mg *p*-aminobenzoic acid and 5 mg lipoic acid. It was filter-sterilized (pore-size,  $\emptyset$  0.2  $\mu\text{m}$ ), kept under a  $\text{N}_2$  gas phase, and stored at 4 °C in the dark, preferentially in a bottle of brown glass.

The coenzyme-M solution contained, for 100 ml: 0.164 g Na-2-mercaptoethanesulfonate dissolved into 100 ml sterile water before filtering onto a  $\emptyset$  0.2  $\mu\text{m}$  membrane. Headspace was filled with pure  $\text{N}_2$  gas and stored at 4 °C, in a bottle of brown glass, until use.

The K3 vitamin solution was prepared as follows: 5 mg/ml vitamin K3 was dissolved in 95% (v/v) ethanol and then diluted 1%<sup>th</sup> in distilled water (final concentration 0.05 mg/ml). The solution was then filter-sterilized and stored at 4 °C under  $\text{N}_2$ , in an opaque flask, until use.

### Text S6. Quantification of substrates and metabolic products

Headspace  $\text{CH}_4$ ,  $\text{H}_2$ ,  $\text{N}_2$  and  $\text{CO}_2$  were measured using a modified INFICON/Micro GC FUSION Gas Analyzer (INFICON, Basel, Switzerland) fitted with a pressure gauge and two conductivity detectors. Separation was performed using two columns: a 10m molecular sieve column at 65 °C and Ar as a carrier gas; and a 12m RT-Q at 60 °C using He as a carrier gas. Gas concentrations were calculated using the method of Mah and colleagues [20] and the results corrected for the decrease in culture medium volume caused by the withdrawal of samples for analysis by ion chromatography.

Samples for cation, anion and methanol analyses were collected in 2 ml tubes and stored at –20 °C. The dilution of each sample was optimized prior to analysis. Sodium, methylated amines (methylamine, dimethylamine, trimethylamine, choline) and ammonium were analyzed using a Dionex ICS-900 Ion Chromatography System (Dionex, Camberley UK) coupled with a CERS 500 4 mm suppressor and a DS5 conductivity detector (40 °C) and fitted with a RFC-10 Reagent-Free Controller<sup>TM</sup>, an ASDV autosampler, and an IonPac CS16 column maintained at 60 °C in a UltiMate<sup>TM</sup> 3000 Thermostated Column Compartment (Thermo Scientific, Waltham, MA, USA). The gradient program was as follows: 18 mM methanesulfonic acid (MSA) for 40 min, increase from 10.4 mM MSA  $\text{min}^{-1}$  to 70 mM (10 min), and then decrease from 52 mM MSA  $\text{min}^{-1}$  to 18 mM (9 min). Acetate, nitrate, thiosulfate and sulfate concentrations were quantified by anion chromatography as described elsewhere [21]. Analysis of methanol concentrations was carried out using an Agilent 6890N Gas

Chromatograph (GC) (Agilent, Santa Clara, USA) coupled with a Flame Ionization Detector (FID) instrument. 1 ml of a mixture composed of 400  $\mu$ l of culture supernatant, 450  $\mu$ l of ultrapure water and 150  $\mu$ l of internal standard (Butanol-1) were placed into a 10 ml vial for heating desorption. Then, 500  $\mu$ l of sample from the gaseous space were injected into the GC-FID using a CTC Combipal autosampler Headspace (Agilent, Santa Clara, USA). Compounds were separated using a Cp-Sil 8CB VARIAN column (30 m, 0.25 mm, *i.d.*; 0.25  $\mu$ m stationary film thickness) (Agilent, Santa Clara, USA) using the following program: 3 min at 40  $^{\circ}$ C, followed by an increase of 10  $^{\circ}$ C  $\text{min}^{-1}$  up to 70  $^{\circ}$ C, held for 15 min; injector and detector temperatures, 250  $^{\circ}$ C; Nitrogen (2.9 ml  $\text{min}^{-1}$ ) was used as a carrier gas.

## **Supplementary Tables and Figures**

**Table S1.** Origin and location of the 86 environmental samples screened as a first approach for the research of *Methanomassiliicoccales*.

| Sample acronym | Sample formal name                         | Sample type                         | Geographical Origin                   | Sampling expedition            | Latitude       | Longitude     | Sampling date | Other characteristics                                 | References |
|----------------|--------------------------------------------|-------------------------------------|---------------------------------------|--------------------------------|----------------|---------------|---------------|-------------------------------------------------------|------------|
| COMRA          | COMRA 34-11 (TB;OI)                        | Deep-sea sediments                  | SW Indian ocean                       | COMRA 2015                     | 38°11'31.25    | 50°42'57.6" E | 12/14/2016    | Marine sediments                                      |            |
| DOURD          | DOURD                                      | Coastal sediments                   | Morlaix bay (France)                  |                                | 48°37'47" N    | 03°50'47" W   | 01/28/2017    | River-influenced marine sediments                     |            |
| HM1            | HM168 0-1                                  | Volcano mud                         | Barents sea (Norway)                  | ARK-XXIV/2 (PS74)              | 72°0'N         | 14°44'E       | 07/23/2007    | Methane emitting mud volcano                          |            |
| HM2            | HM168 1-6                                  | Volcano mud                         | Barents sea (Norway)                  | ARK-XXIV/2 (PS74)              | 72°0'N         | 14°44'E       | 07/23/2007    | Methane emitting mud volcano                          |            |
| HM3            | HM168 6-11                                 | Volcano mud                         | Barents sea (Norway)                  | ARK-XXIV/2 (PS74)              | 72°0'N         | 14°44'E       | 07/23/2007    | Methane emitting mud volcano                          |            |
| HM4            | HM189 1-6                                  | Volcano mud                         | Barents sea (Norway)                  | ARK-XXIV/2 (PS74)              | 72°0'N         | 14°44'E       | Sept. 2007    | Methane emitting mud volcano                          |            |
| KERG           | Kerguelen - Rallier du Baty Source PFJ     | Geothermal water                    | Kerguelen Island (French TAAF)        | IPEV n° 1077, TALISKER program | 49°38'40.4" S  | 68°47'02.1" E | 12/14/2016    | Hot spring located at the "Feu de Joie" beach         |            |
| KRY150         | Kryos150                                   | Deep-sea hypersaline anoxic brine   | Kryos basin (Mediterranean sea)       | -                              | 35°02'N        | 22°01'E       | 05/17/2016    | 150 g.l <sup>-1</sup> salts (MgCl <sub>2</sub> -rich) |            |
| KRY238         | Kryos238                                   | Deep-sea hypersaline anoxic brine   | Kryos basin (Mediterranean sea)       | -                              | 35°02'N        | 22°01'E       | 05/17/2016    | 238 g.l <sup>-1</sup> salts (MgCl <sub>2</sub> -rich) |            |
| MOUG1          | TB3                                        | Peatland soil                       | Communa peatland (France)             | -                              | 48°23'56" N    | 3°57'56" W    | 01/25/2017    | Slightly acidic                                       |            |
| MOUG2          | TB4                                        | Peatland soil                       | Communa peatland (France)             | -                              | 48°23'53" N    | 3°57'56" W    | 01/25/2017    | Acidic                                                |            |
| MOUG3          | TB5                                        | Peatland soil                       | Communa peatland (France)             | -                              | 48°23'48" N    | 3°57'51" W    | 01/25/2017    | Acidic                                                |            |
| MOUG4          | TB7                                        | Peatland soil                       | Communa peatland (France)             | -                              | 48°23'53.16" N | 3°57'55.8" W  | 02/29/2018    | Acidic                                                |            |
| MOUG5          | Riv1                                       | Freshwater sediments                | Communa peatland (France)             | -                              | 48°23'55" N    | 3°57'6" W     | 01/25/2017    | Stream running through a bog                          |            |
| MOZ1           | MOZ4 MTB03 2-4 cm culture anaérobie 11/15  | Sediments from a pockmarck area     | Mozambique Channel (Madagascar shore) | PAMELA-MOZ4                    | 15°22'14" S    | 45°57'06" E   | Nov. 2015     | Area of cold fluid migration                          |            |
| MOZ2           | MOZ4 MTB03 4-6 cm culture anaérobie 11/15  | Sediments from a pockmarck area     | Mozambique Channel (Madagascar shore) | PAMELA-MOZ4                    | 15°22'14" S    | 45°57'06" E   | Nov. 2015     | Area of cold fluid migration                          |            |
| MOZ3           | MOZ4 MTB03 6-11 cm culture anaérobie 11/15 | Sediments from a pockmarck area     | Mozambique Channel (Madagascar shore) | PAMELA-MOZ4                    | 15°22'14" S    | 45°57'06" E   | Nov. 2015     | Area of cold fluid migration                          |            |
| PAV1           | PAVIN60                                    | Anoxic water from a meromictic lake | Pavin lake (France)                   | -                              | 45°29'45" N    | 2°53'18" E    | 12/17/2018    | Ferruginous and sulfidic waters                       |            |



| Sample acronym | Sample formal name                     | Sample type                         | Geographical Origin                   | Sampling expedition | Latitude       | Longitude      | Sampling date | Other characteristics                        | References                                                                                                                                |
|----------------|----------------------------------------|-------------------------------------|---------------------------------------|---------------------|----------------|----------------|---------------|----------------------------------------------|-------------------------------------------------------------------------------------------------------------------------------------------|
| PAV2           | PAVIN70                                | Anoxic water from a meromictic lake | Pavin lake (France)                   | -                   | 45°29'45" N    | 2°53'18" E     | 12/17/2018    | Ferruginous and sulfidic waters              |                                                                                                                                           |
| PAV3           | PAVIN80                                | Anoxic water from a meromictic lake | Pavin lake (France)                   | -                   | 45°29'45" N    | 2°53'18" E     | 12/17/2018    | Ferruginous and sulfidic waters              |                                                                                                                                           |
| PENF           | Sed2 Penfeld                           | Freshwater sediments                | Brest Kervallon garden (France)       | -                   | 48°23'38.82" N | 4°30'36.12" W  | 02/06/2017    | Coarse sand                                  |                                                                                                                                           |
| XIA            | XIA                                    | Water from a geothermal hot spring  | Xiamen Botanical Garden (China)       | -                   | 24°26'25" N    | 118°6'17" E    | 12/09/2013    | Iron-rich hot spring with a salinity of 1.3% |                                                                                                                                           |
|                | Grand-Dellec                           | Coastal sediments                   | Brest bay (France)                    | -                   | 48°21'5" N     | 4°34'12" W     | Jan. 2017     | Marine sediments                             |                                                                                                                                           |
|                | Sainte-Anne                            | Coastal sediments                   | Brest bay (France)                    | -                   | 48°21'41" N    | 4°33'12" W     | Jan. 2017     | Marine sediments                             |                                                                                                                                           |
|                | COMRA 34-9 (TB;OI)                     | Deep-sea sediments                  | South West Indian ocean               | COMRA 2015          |                |                |               | Marine sediments                             |                                                                                                                                           |
|                | COMRA 34-10 (TB;OI)                    | Deep-sea sediments                  | South West Indian ocean               | COMRA 2015          | 38°11'32" S    | 50°42'56" E    | Avr. 2015     | Marine sediments                             |                                                                                                                                           |
|                | COMRA 34-12 (TB;OI)                    | Deep-sea sediments                  | South West Indian ocean               | COMRA 2015          | 38°11'32.2" S  | 50°42'56.4" E  | Avr. 2015     | Marine sediments                             |                                                                                                                                           |
|                | COMRA 34-28 (TB;OI)                    | Deep-sea sediments                  | South West Indian ocean               | COMRA 2015          | 38°10'62.65" S | 49°59'42.28" E | Mai 2015      | Marine sediments                             |                                                                                                                                           |
|                | BIG, 4, CT4, S1 0-5 cm                 | Deep-sea hydrothermal vent          | Guaymas basin (Mexico)                | BIG                 | 27°25.484' N   | 111° 30.074' W | 06/14/2010    |                                              | <a href="https://campagnes.flotteoceanographique.fr/prl?id=BFBGX-43350">https://campagnes.flotteoceanographique.fr/prl?id=BFBGX-43350</a> |
|                | BIG, 4, CT4, S1 15-20 cm               | Deep-sea hydrothermal vent          | Guaymas basin (Mexico)                | BIG                 | 27°25.484' N   | 111° 30.074' W | 06/14/2010    |                                              | <a href="https://campagnes.flotteoceanographique.fr/prl?id=BFBGX-43350">https://campagnes.flotteoceanographique.fr/prl?id=BFBGX-43350</a> |
|                | YK13-05 MCR 6K 1350 BEEBE WOOD Ifremer | Deep-sea hydrothermal vent          | Mid-Cayman Rise                       | YK13-05             | 18°32'76.41" N | 81°43'08.86" W | 06/22/2013    |                                              |                                                                                                                                           |
|                | YK13-05 MCR 6K 1356 Hole to Hell       | Deep-sea hydrothermal vent          | Mid-Cayman Rise                       | YK13-05             | 18°22'58" N    | 81°47'89" W    | 06/28/2013    |                                              |                                                                                                                                           |
|                | YK13-05 MCR 6K 1354 BVF #Ifremer       | Deep-sea hydrothermal vent          | Mid-Cayman Rise                       | YK13-05             | 18°32'78.77" N | 81°43'09.55" W | 06/26/2013    |                                              |                                                                                                                                           |
|                | YK13-056K FH1349A BEEBE# Left          | Deep-sea hydrothermal vent          | Mid-Cayman Rise                       | YK13-05             | 18°32'47" N    | 81°43'7.1" W   | 06/21/2013    |                                              |                                                                                                                                           |
|                | Urania                                 | Deep-sea mud volcano                | Mediterranean Sea                     |                     | 35°60'N        | 22°01'E        | 05/18/2016    |                                              |                                                                                                                                           |
|                | KESC 9 - 14 50 cm                      | Deep-sea sediments                  | Var ridge, Mediterranean Sea (France) | RHOSOS              | 43°32'26" N    | 7°11'13.999" E | 10/07/2008    |                                              |                                                                                                                                           |
|                | KESC 9 - 14 180 cm                     | Deep-sea sediments                  | Var ridge, Mediterranean Sea (France) | RHOSOS              | 43°32'26" N    | 7°11'13.999" E | 10/07/2008    |                                              |                                                                                                                                           |
|                | KESC 9 - 14 140 10/08                  | Deep-sea sediments                  | Var ridge, Mediterranean Sea (France) | RHOSOS              | 43°23'.016 N   | 07°44'.187 E   | 10/07/2008    |                                              | [22]                                                                                                                                      |
|                | KESC 9 - 14 180 10/08                  | Deep-sea sediments                  | Var ridge, Mediterranean Sea (France) | RHOSOS              | 43°23'.016 N   | 07°44'.187 E   | 10/07/2008    |                                              | [22]                                                                                                                                      |
|                | KESC 9 - 14 200 10/08                  | Deep-sea sediments                  | Var ridge, Mediterranean Sea (France) | RHOSOS              | 43°23'.016 N   | 07°44'.187 E   | 10/07/2008    |                                              | [22]                                                                                                                                      |

| Sample acronym | Sample formal name                        | Sample type                              | Geographical Origin                                       | Sampling expedition                     | Latitude       | Longitude    | Sampling date | Other characteristics                                                                                                                     | References |
|----------------|-------------------------------------------|------------------------------------------|-----------------------------------------------------------|-----------------------------------------|----------------|--------------|---------------|-------------------------------------------------------------------------------------------------------------------------------------------|------------|
|                | KESC 9 - 14 240<br>10/08                  | Deep-sea sediments                       | Var ridge (France)                                        | RHOSOS                                  | 43°23'.016 N   | 07°44'.187 E | 10/07/2008    |                                                                                                                                           | [22]       |
|                | KESC 9 - 14 280<br>10/08                  | Deep-sea sediments                       | Var ridge (France)                                        | RHOSOS                                  | 43°23'.016 N   | 07°44'.187 E | 10/07/2008    |                                                                                                                                           | [22]       |
|                | Leg 317 3H1                               | Deep-sea sediments                       | Canterbury ridge<br>(New-Zealand)                         |                                         | 44°56'26.62" S | 172°1'36" E  | Nov. 2009     |                                                                                                                                           |            |
|                | RHS-KS-33-50<br>10/08                     | Deep-sea sediments                       | Gulf of Lion,<br>Western<br>Mediterranean Sea<br>(France) | RHOSOS                                  | 42°41'.596 N   | 03°50'.493 E | Oct. 2008     | <a href="https://campagnes.flotteoceanographique.fr/prl?id=BFBGX-86654">https://campagnes.flotteoceanographique.fr/prl?id=BFBGX-86654</a> | [22];      |
|                | RHS-KS-33-150<br>10/08                    | Deep-sea sediments                       | Gulf of Lion,<br>Western<br>Mediterranean Sea<br>(France) | RHOSOS                                  | 42°41'.596 N   | 03°50'.493 E | Oct. 2008     | <a href="https://campagnes.flotteoceanographique.fr/prl?id=BFBGX-86654">https://campagnes.flotteoceanographique.fr/prl?id=BFBGX-86654</a> | [22];      |
|                | RHS-KS-33-350<br>10/08                    | Deep-sea sediments                       | Gulf of Lion,<br>Western<br>Mediterranean Sea<br>(France) | RHOSOS                                  | 42°41'.596 N   | 03°50'.493 E | Oct. 2008     | <a href="https://campagnes.flotteoceanographique.fr/prl?id=BFBGX-86654">https://campagnes.flotteoceanographique.fr/prl?id=BFBGX-86654</a> | [22];      |
|                | RHS-KS-33-450<br>10/08                    | Deep-sea sediments                       | Gulf of Lion,<br>Western<br>Mediterranean Sea<br>(France) | RHOSOS                                  | 42°41'.596 N   | 03°50'.493 E | Oct. 2008     | <a href="https://campagnes.flotteoceanographique.fr/prl?id=BFBGX-86654">https://campagnes.flotteoceanographique.fr/prl?id=BFBGX-86654</a> | [22];      |
|                | RHS-KS-33-550<br>10/08                    | Deep-sea sediments                       | Gulf of Lion,<br>Western<br>Mediterranean Sea<br>(France) | RHOSOS                                  | 42°41'.596 N   | 03°50'.493 E | Oct. 2008     | <a href="https://campagnes.flotteoceanographique.fr/prl?id=BFBGX-86654">https://campagnes.flotteoceanographique.fr/prl?id=BFBGX-86654</a> | [22];      |
|                | RHS-KS-33-710<br>10/08                    | Deep-sea sediments                       | Gulf of Lion,<br>Western<br>Mediterranean Sea<br>(France) | RHOSOS                                  | 42°41'.596 N   | 03°50'.493 E | Oct. 2008     | <a href="https://campagnes.flotteoceanographique.fr/prl?id=BFBGX-86654">https://campagnes.flotteoceanographique.fr/prl?id=BFBGX-86654</a> | [22];      |
|                | TVG10 - 20V - S20<br>Jaigo 3.12           | Deep-sea sediments                       | North West Indian<br>ocean                                | -                                       |                |              |               |                                                                                                                                           |            |
|                | Sed3 Penfeld                              | Freshwater<br>sediments                  | Brest Kervallon<br>garden (France)                        | -                                       | 48°23'39.5" N  | 4°30'35.9" W | 02/06/2017    |                                                                                                                                           |            |
|                | Kerguelen - Rallier<br>du Baty Source 15  | Water from a<br>geothermal hot<br>spring | Kerguelen Island<br>(French TAAF)                         | IPEV n°<br>1077,<br>TALISKER<br>program | 49°36'S        | 68°56'E      | 12/13/2016    |                                                                                                                                           |            |
|                | Kerguelen - Rallier<br>du Baty Source 18  | Water from a<br>geothermal hot<br>spring | Kerguelen Island<br>(French TAAF)                         | IPEV n°<br>1077,<br>TALISKER<br>program | 49°36'S        | 68°56'E      | 12/13/2016    |                                                                                                                                           |            |
|                | Kerguelen - Rallier<br>du Baty Source 107 | Water from a<br>geothermal hot<br>spring | Kerguelen Island<br>(French TAAF)                         | IPEV n°<br>1077,<br>TALISKER<br>program | 49°36'S        | 68°56'E      | 12/14/2016    |                                                                                                                                           |            |
|                | XIA2                                      | Water from a<br>geothermal hot<br>spring | Xiamen Botanical<br>Garden (China)                        | -                                       | 24°26'25" N    | 118°6'17" E  | 12/09/2013    |                                                                                                                                           |            |
|                | PAVIN60-2                                 | Anoxic water from<br>a meromictic lake   | Pavin lake (France)                                       | -                                       | 45°29'45" N    | 2°53'18" E   | 10/24/2016    | Ferruginous and<br>sulfidic waters                                                                                                        |            |

| Sample acronym | Sample formal name                          | Sample type                         | Geographical Origin                   | Sampling expedition | Latitude       | Longitude     | Sampling date | Other characteristics           | References |
|----------------|---------------------------------------------|-------------------------------------|---------------------------------------|---------------------|----------------|---------------|---------------|---------------------------------|------------|
|                | PAVIN70-2                                   | Anoxic water from a meromictic lake | Pavin lake (France)                   | -                   | 45°29'45" N    | 2°53'18" E    | 10/24/2016    | Ferruginous and sulfidic waters |            |
|                | Aydat                                       | Anoxic water from a meromictic lake | Aydat lake (France)                   | -                   | 45°39'50" N    | 02°59'12" E   | 10/24/2016    |                                 |            |
|                | TREM1                                       | Peatland soil                       | Trémaouézan peatland (France)         | -                   | 48°30'19" N    | 04°16'21" W   | 01/25/2017    | Slightly acidic                 |            |
|                | TREM2                                       | Peatland soil                       | Trémaouézan peatland (France)         | -                   | 48°30'27" N    | 04°16'23" W   | 01/25/2017    | Slightly acidic                 |            |
|                | TB6                                         | Peatland soil                       | Communa peatland (France)             | -                   | 48°23'56.8" N  | 3°57'56.3" E  | 01/25/2017    | Slightly acidic                 |            |
|                | TB8                                         | Peatland soil                       | Communa peatland (France)             | -                   | 48°23'53.16" N | 3°57'55.8" W  | 02/26/2018    | Slightly acidic                 |            |
|                | TB9                                         | Peatland soil                       | Communa peatland (France)             | -                   | 48°23'53.88" N | 3°57'55.8" W  | 02/26/2018    | Slightly acidic                 |            |
|                | TB10                                        | Peatland soil                       | Communa peatland (France)             | -                   | 48°23'56.76" N | 3°57'56.52" W | 02/26/2018    |                                 |            |
|                | 131.18.1.S2                                 | Sediments from a pockmark area      |                                       | -                   | 04°45'605" S   | 9°56'423" E   |               |                                 | [23]       |
|                | GeoB 13114-2-S1                             | Sediments from a pockmark area      | Hydrate Hole (Guinea)                 | M76-/3a             | 04°48'57" S    | 09°54'50" E   | 06/26/2008    |                                 | [23]       |
|                | GeoB 13114-2-S2                             | Sediments from a pockmark area      | Hydrate Hole (Guinea)                 | M76/3a              | 04°48.581 S    | 09°54.496 E   | 06/26/2008    |                                 | [23]       |
|                | GeoB 13114-2-S4                             | Sediments from a pockmark area      | Hydrate Hole (Guinea)                 | M76/3a              | 04°48.581 S    | 09°54.496 E   | 06/26/2008    |                                 | [23]       |
|                | GeoB 13118-1-S1                             | Sediments from a pockmark area      | Worm Hole (Guinea)                    | M76/3a              | 04°45'605" S   | 09°56'423" E  | 06/29/2008    |                                 | [23]       |
|                | GeoB 13118-1-S2                             | Sediments from a pockmark area      | Worm Hole (Guinea)                    | M76/3a              | 04°45'605" S   | 09°56'423" E  | 06/29/2008    |                                 | [23]       |
|                | GeoB 13121-2-S3                             | Sediments from a pockmark area      | REGAB (Guinea)                        | M76/3a              | 05°47.881 S    | 09°42.805 E   | 07/06/2008    |                                 | [23]       |
|                | GeoB 13121-1-S4                             | Sediments from a pockmark area      | REGAB (Guinea)                        | M76/3a              | 05°47.881 S    | 09°42.805 E   | 07/06/2008    |                                 | [23]       |
|                | GeoB 14-2-S1                                | Sediments from a pockmark area      |                                       | M76/3a              |                |               |               |                                 |            |
|                | GeoB 14-2-S2                                | Sediments from a pockmark area      |                                       | M76/3a              |                |               |               |                                 |            |
|                | GeoB 14-2-S4                                | Sediments from a pockmark area      |                                       | M76/3a              |                |               |               |                                 |            |
|                | MOZ4 MTB03 11-16 cm culture anaérobic 11/15 | Sediments from a pockmark area      | Mozambique Channel (Madagascar shore) | PAMELA-MOZ4         | 15°22'14" S    | 45°57'06" E   | Nov. 2015     | Area of cold fluid migration    |            |
|                | MOZ4 MTB03 16-21 cm culture anaérobic 11/15 | Sediments from a pockmark area      | Mozambique Channel (Madagascar shore) | PAMELA-MOZ4         | 15°22'14" S    | 45°57'06" E   | Nov. 2015     | Area of cold fluid migration    |            |
|                | MOZ4 MTB03 21-24 cm culture anaérobic 11/15 | Sediments from a pockmark area      | Mozambique Channel (Madagascar shore) | PAMELA-MOZ4         | 15°22'14" S    | 45°57'06" E   | Nov. 2015     | Area of cold fluid migration    |            |
|                | MOZ4 CZSF04 S1-25 culture anaérobic 11/2015 | Sediments from a pockmark area      | Mozambique Channel (Madagascar shore) | PAMELA-MOZ4         |                |               | Nov. 2015     | Area of cold fluid migration    |            |

| Sample acronym | Sample formal name                          | Sample type                    | Geographical Origin                                                             | Sampling expedition | Latitude      | Longitude     | Sampling date | Other characteristics        | References |
|----------------|---------------------------------------------|--------------------------------|---------------------------------------------------------------------------------|---------------------|---------------|---------------|---------------|------------------------------|------------|
|                | MOZ4 CZSF04 S2-38 culture anaérobic 11/2015 | Sediments from a pockmark area | Mozambique Channel (Madagascar shore)                                           | PAMELA-MOZ4         |               |               | Nov. 2015     | Area of cold fluid migration |            |
|                | MOZ4 CZSF04 S3-25 culture anaérobic 11/2015 | Sediments from a pockmark area | Mozambique Channel (Madagascar shore)                                           | PAMELA-MOZ4         |               |               | Nov. 2015     | Area of cold fluid migration |            |
|                | MOZ4 CZSF04 S5-25 culture anaérobic 11/2015 | Sediments from a pockmark area | Mozambique Channel (Madagascar shore)                                           | PAMELA-MOZ4         |               |               |               | Area of cold fluid migration |            |
|                | PAMELA MOZ01 MTB7 7-12                      | Sediments from a pockmark area | Mozambique Channel (Madagascar shore)                                           | PAMELA-MOZ1         |               |               | Nov. 2015     | Area of cold fluid migration |            |
|                | PAMELA MOZ01 KGS03                          | Sediments from a pockmark area | Mozambique Channel (Madagascar shore)                                           | PAMELA-MOZ1         |               |               | Nov. 2015     | Area of cold fluid migration |            |
|                | MD-PL-20-TI1 - 341-20-Ti1 10ml              | Submarine brine                | Chefren mud volcano, Nile Deep Sea fan, Eastern Mediterranean Sea (Egypt shore) | MEDECO              | 32° 6.584' N  | 28° 10.655' E | 11/17/2007    |                              |            |
|                | MD-PL-20-MBS1 - 34-20-MBS-1                 | Submarine brine                | Chefren mud volcano, Nile Deep Sea fan, Eastern Mediterranean Sea (Egypt shore) | MEDECO              | 31° 59.498' N | 28° 3.512' E  | 11/17/2007    |                              |            |

**Table S2.** Number of 16S rRNA gene sequence reads of the various *Methanomassiliicoccales* OTUs, other methanogens OTUs and total prokaryotic OTUs generated by metabarcoding, in the various studied environmental samples and in culture-based experiments PENF, DOUR and MOUG2. Other OTUs: sum of the reads in the scarce OTUs of *Methanomassiliicoccales*.

| Origin                | Sample | <i>Methanomassiliicoccales</i> |        |        |       |        |         |         |                                           | Other methanogens | Total Prokaryotes |
|-----------------------|--------|--------------------------------|--------|--------|-------|--------|---------|---------|-------------------------------------------|-------------------|-------------------|
|                       |        | OTU21                          | OTU101 | OTU499 | OTU30 | OTU926 | OTU1789 | OTU2685 | Other <i>Methanomassiliicoccales</i> OTUs |                   |                   |
| Environmental samples | COMRA  | 0                              | 0      | 0      | 10    | 0      | 0       | 0       | 0                                         | 16                | 33543             |
|                       | DOUR   | 0                              | 0      | 0      | 26    | 1      | 0       | 2       | 1                                         | 70                | 27577             |
|                       | HM1    | 0                              | 0      | 0      | 19    | 0      | 0       | 0       | 0                                         | 1153              | 83723             |
|                       | HM2    | 0                              | 0      | 0      | 22    | 0      | 0       | 0       | 1                                         | 1152              | 115163            |
|                       | HM3    | 0                              | 0      | 4      | 27    | 0      | 0       | 0       | 0                                         | 2795              | 135293            |
|                       | HM4    | 0                              | 0      | 0      | 13    | 0      | 0       | 0       | 0                                         | 312               | 76722             |
|                       | KERG   | 1                              | 98     | 1      | 64    | 0      | 0       | 0       | 0                                         | 205               | 112160            |
|                       | KRY150 | 0                              | 0      | 0      | 4     | 0      | 0       | 0       | 0                                         | 199               | 33073             |
|                       | KRY238 | 0                              | 0      | 0      | 9     | 0      | 0       | 0       | 0                                         | 17                | 32803             |
|                       | MOUG1  | 0                              | 0      | 1      | 11    | 0      | 0       | 0       | 0                                         | 32                | 21147             |
|                       | MOUG2  | 0                              | 0      | 1      | 20    | 3      | 0       | 0       | 0                                         | 1323              | 42023             |
|                       | MOUG3  | 4                              | 0      | 1      | 18    | 3      | 0       | 0       | 0                                         | 425               | 19965             |
|                       | MOUG4  | 0                              | 0      | 0      | 24    | 1      | 0       | 0       | 0                                         | 2519              | 51257             |
|                       | MOUG5  | 0                              | 0      | 0      | 7     | 0      | 0       | 0       | 0                                         | 65                | 43768             |
|                       | MOZ1   | 3                              | 3      | 23     | 131   | 4      | 0       | 2       | 5                                         | 1042              | 51432             |
|                       | MOZ2   | 2                              | 3      | 396    | 141   | 12     | 0       | 39      | 3                                         | 952               | 82240             |
|                       | MOZ3   | 1                              | 3      | 590    | 187   | 6      | 0       | 27      | 6                                         | 1147              | 77662             |
|                       | PAV60  | 1                              | 0      | 3      | 26    | 0      | 0       | 0       | 0                                         | 45                | 133308            |
|                       | PAV70  | 0                              | 9      | 1      | 50    | 22     | 0       | 0       | 0                                         | 328               | 151718            |
|                       | PAV80  | 0                              | 0      | 4      | 46    | 62     | 0       | 0       | 0                                         | 425               | 128262            |
| PENF                  | 34     | 5                              | 2      | 72     | 115   | 0      | 0       | 1       | 324                                       | 42386             |                   |
| XIA                   | 0      | 0                              | 0      | 4      | 0     | 0      | 0       | 0       | 15                                        | 60330             |                   |
| Enrichment culture    | PF T1  | 13                             | 1      | 0      | 2     | 31     | 0       | 0       | 0                                         | 47                | 113032            |
|                       | PF T2  | 57                             | 3      | 0      | 0     | 1      | 0       | 0       | 0                                         | 61                | 128451            |
|                       | PF T3  | 74                             | 12     | 0      | 1     | 0      | 0       | 0       | 0                                         | 87                | 158370            |
|                       | PF T4  | 28                             | 5      | 0      | 0     | 10     | 0       | 0       | 0                                         | 43                | 237339            |
|                       | PF T5  | 603                            | 21     | 0      | 0     | 2      | 0       | 0       | 1                                         | 627               | 255024            |
|                       | PF T6  | 5039                           | 262    | 0      | 3     | 5      | 0       | 0       | 10                                        | 5319              | 339383            |
|                       | PF T7  | 10365                          | 1254   | 0      | 1     | 5      | 0       | 0       | 15                                        | 11640             | 188034            |
|                       | PF T8  | 41550                          | 6435   | 0      | 17    | 2      | 1       | 0       | 56                                        | 48061             | 321670            |

|               |       |      |    |   |    |    |   |    |       |        |
|---------------|-------|------|----|---|----|----|---|----|-------|--------|
| <b>PF T9</b>  | 24161 | 3654 | 0  | 0 | 4  | 0  | 0 | 35 | 27854 | 319970 |
| <b>PF T10</b> | 30291 | 3070 | 0  | 2 | 0  | 1  | 0 | 27 | 33391 | 384057 |
| <b>DF T1</b>  | 7     | 0    | 0  | 0 | 0  | 0  | 0 | 0  | 7     | 115420 |
| <b>DF T3</b>  | 25    | 0    | 0  | 0 | 0  | 3  | 0 | 0  | 28    | 248964 |
| <b>DF T6</b>  | 17    | 0    | 14 | 0 | 0  | 19 | 0 | 0  | 50    | 178985 |
| <b>DF T8</b>  | 20    | 6    | 0  | 0 | 0  | 28 | 0 | 0  | 54    | 212050 |
| <b>DF T10</b> | 14    | 64   | 0  | 1 | 0  | 56 | 0 | 0  | 135   | 202382 |
| <b>TB T1</b>  | 10    | 0    | 0  | 0 | 17 | 0  | 0 | 0  | 27    | 153856 |
| <b>TB T4</b>  | 26    | 1    | 0  | 0 | 41 | 0  | 0 | 0  | 68    | 350070 |
| <b>TB T6</b>  | 18    | 1    | 0  | 0 | 10 | 0  | 0 | 0  | 29    | 203877 |
| <b>TB T8</b>  | 16    | 0    | 0  | 0 | 6  | 0  | 0 | 0  | 22    | 205008 |
| <b>TB T11</b> | 20    | 1    | 0  | 3 | 8  | 1  | 0 | 0  | 33    | 284002 |

**Table S3.** List of the *Methanomassiliicoccales* 16S rRNA gene sequences identified in the metagenome of the culture-based experiment PENF T8 (8<sup>th</sup> week of incubation), and 16S rRNA gene representative sequences of OTUs identified as *Methanomassiliicoccales* by the SILVA 138 database in the metabarcoding analysis.

|                                                                                                                                                                                                                                                                                                                                                                                                                                                                                                                                                                                                                                                                                                                                                                                                                                                                                                                                                                                                                                                                                                                                                                                                                                                                                                                                                                                                                                                                                                                                                                                                                                                                                                                                                                                                   |
|---------------------------------------------------------------------------------------------------------------------------------------------------------------------------------------------------------------------------------------------------------------------------------------------------------------------------------------------------------------------------------------------------------------------------------------------------------------------------------------------------------------------------------------------------------------------------------------------------------------------------------------------------------------------------------------------------------------------------------------------------------------------------------------------------------------------------------------------------------------------------------------------------------------------------------------------------------------------------------------------------------------------------------------------------------------------------------------------------------------------------------------------------------------------------------------------------------------------------------------------------------------------------------------------------------------------------------------------------------------------------------------------------------------------------------------------------------------------------------------------------------------------------------------------------------------------------------------------------------------------------------------------------------------------------------------------------------------------------------------------------------------------------------------------------|
| <p>&gt;k119-35148<br/>                 GCCACCCTATTGGAATACGATTAAGACATGCGAGTCGAGAGACGTAAGGTCTCGGGGACCGCTCAGTAACACGTGGATAACATGCCCTAAGTGGG<br/>                 GGATAATCTCGGGAAACTGAGGATAATACCCCATAGGTCTAGTCTGCTGGAATGCTTTCAGGCCGAAAACCTCCGGTGCCTTAGGATTGGTCTGCGGTCTA<br/>                 TCAGGCTGTAGTGGGTGTAACGGACCCTAGCCCGTGACGGATATGGCCCTTGAGAGAGGGAGCCAGAGATGGACTGTAGACATGAGTCCAGGCC<br/>                 CTACCGGGCGCAGCAGTCCGGAAAACCTTCGCAATGGGGCAACCCCGACGAGGGAAATCCAAGTGCCAGCACTTGTGTGGCTGTTCTCTGTCTAAA<br/>                 AAACAGGAGGAGTAAGGGCGGTAAGACGGGTGCCAGCCCGCGGTAATACCCGCGCCCTAGTGGTGGTCGATATTATTGACCTAAAACGTCCG<br/>                 TAGCCGGTCTCTAAATCCTTGGGTAATTCGGGCAGCTTAACTGTCCGAAGTCCGGGGAGACTGGGAGACTTGGGACCGGGAGAGGTGACAGGTA<br/>                 TGGGTAGGGGTAATACTCTGTAATCCTGGAAGGACCACCGGTGGCGAAGCGCTCTGACTAGAACGGATCCGACGGTGGGGACGAAGCCCTGGGGC<br/>                 CAAACGGGATTAGATACCCCGGTAGTCCAGGGTAAACGCTGCGGGCTTGGTGTGGGGTCTTGTAGTGGCGCCAGTCCGGAGAGAAGTTGTAA<br/>                 GCCTGTCTTGGGGAGTATGTCGCAAGGATGAACTTAAAGGAATTGGCGGGGAGCACCAGCAACGGGAGGAGCGTGGCTTCAATTGGATTCAAC<br/>                 GCCGAAAAACTCACCAGGAGCGACGGATATATGAAGTCAAGTGTAGTACTTACCTGATTTTCCGAGAGGTGGTGCATGGCCGTGTCAGTTCGTACC<br/>                 GTAAGCGTCTCTTAAGTGAATAACGAACGAGACCCCTACCAATTAATTGTAGTCTTCTCCGGAGGGGCGACATTAATGGGACCGCTGGCGCTA<br/>                 AGTCAAGGTAAGGAGGTCAACGGTAGTCCGATGCCCCAATGCGGCAACACCGCGCTACAAAGGGTGGGACAATGGGCTTCGACACCGA<br/>                 AAGGTGAAGACAATCTGAAACCCATCCATAGTTCGGATTGGGGCTGTAACCCGCCCATGAAGTGGATTCCGTAGTAAATCGCTTGTCAACATCAA<br/>                 GCGGTGAATATGCCCTGTCTTGCACACACCGCCGTCAAACACCGAGTGGGTTTCAGTAAGGATGTCTCTAATTTGGGGCTTCGAACTGAGATT<br/>                 CAGCAAGGAGGTTAAGTCGTAACAAGGTATCTGTAGGGAACTGCAGATGGATCACCTCTAC</p> |
| <p>&gt;k119-91804<br/>                 GCCACCCTATTGGAATCGATTAAGACATGCGAGTCGAGAGTCGCAAGGACTCGGGGACCGCTCAGTAACACCGGGATAACATGCCCTTGGTGGG<br/>                 GGATAACCTCGGGAAACTGAGAATAATACCCCATAGATCTAGAAGTGGAAATGCTTTAGATCCAAAACCTCCGGTGCCTAAGGATTGGTCTGCGGCT<br/>                 ATCAGTGTAGTGGGTGTAACGGACCCCTAGCCTATGACGCGTAAGGGCCTTGAGAGAGGGAGCCCTGAGATGGACTGTAGACATGAGTCCAGGCC<br/>                 CTACCGGGCGCAGCAGTCCGGAAAACCTTCACAATGGGGCAACCCCGATGAGGGAAATCCAAGTGCCAGCACTTGTGTGGCTGTTCTTGTCTAAA<br/>                 AAACAGAGAAGTAAGGGCGGTAAGACGGGTGCCAGCCCGCGGTAATACCCGCGCCGAGTGGTGGTCGATATTATTGACCTAAAACGTCCG<br/>                 TAGCCGGTCTCTAAATCCTTGGGTAATTCGACAGCTTAACTGTTCGAAGTCCGGGGAGACTGCAAGACTTGGGATCGGGAGAGGTGAGAGGTA<br/>                 GGGTAGGGTAAAATCCTGTAATCCTAGAAGGACCACCGGTGGCGAAGCGCTCTACTAGAACGAATCCGACGGTGGGGACGAAGCCCTGGGGC<br/>                 AAACGGGATTAGATACCCCGGTAGTCCAGGGTGAACCGCTGCGGGCTTGGTGTGGGGTCTTGTAGGGCGCCAGTCCGGAGAGAAGTTGTAAAG<br/>                 CCTGTCTTGGGGAGTACGTCGCAAGGATGAACTTAAAGGAATTGGCGGGGAGCACCAGCAACGGGAGGAGCGTGGCTTCAATTGGATTCAACA<br/>                 CCGGACAACCTCACCAGGAGCGACGGTACATGAAGGCCAGGCTGATGACCTTGCCTGATTTTCCGAGAGGTGGTGCATGGCCGTGTCAGTTCGTACC<br/>                 TAAGGGTCTCTTAAGTGAATAACGAACGAGACCCCTACCCGTAATTTCTGTAGTCTTCTCCGGAGAGCAGCACATTAACGGGACCGCTGCGCTAA<br/>                 GACAGAGGAAGGAGAGGTCAACGGTAGGTCCGATGCCCCGAATCTCCTGGGTAACCCGCGCTACAAAGGTGGGACAATGGGCTCCGACATCGAA<br/>                 AGGTGAAGCAATCTGAAACCCATCCGATTCGGATTGAGGGTGAACCTACCCCTATGAAGTGGATTCCGTAGTAAATCGCGGATCAACAATCCG<br/>                 CGGTGAATATGCCCTGTCTTGCACACACCGCCGTCAAACACCGAGTGGGTTTCAGTAAGGATATCTCAATTTGGGGTCTTCGAACTGAGATTCA<br/>                 GCAAGGAGGGTT</p>                                                    |
| <p>&gt;OTU21<br/>                 TACCCGCGCCCTAGTGGTGGTCGATATTATTGAGCCTAAAACGTCCGTAGCCGGTCTTCTAAATCCTTGGGTAATCGGGCAGCTTAACTGTCCGAAGT<br/>                 CCGGGGAGACTGGAAGACTTGGGACCGGGAGAGGTGACAGGTAATCTTGGGGTAGGGGTAATAATCCTGTAATCCTGGAAGGACCACCGGTGGCGAAGG<br/>                 CGTCTGACTAGAACGGATCCGACGGTGGGGACGAAGCCCTGGGGCGCAAACCGG</p>                                                                                                                                                                                                                                                                                                                                                                                                                                                                                                                                                                                                                                                                                                                                                                                                                                                                                                                                                                                                                                                                                                                                                                                                                                                                                                                                                                                                                                                     |
| <p>&gt;OTU30<br/>                 TACCCGCGCCCAAGTGGTGGTCGATATTATTGAGCCTAAAACGTCCGTAGCCGGTCTTCTAAATCCTTGGGTAATCGGGCAGCTCAACTGTCCGAATT<br/>                 CCGGGGAGACTGGGAGACTTGGGACCGGGAGAGGTGACAGGTAATCTTGGGGTAGGGGTAATAATCCTGTAATCCTGGAAGGACCACCGGTGGCGAAGG<br/>                 CGTCTGACTAGAACGGATCCGACGGTGGGGACGAAGCCCTGGGGCGCAAACCGG</p>                                                                                                                                                                                                                                                                                                                                                                                                                                                                                                                                                                                                                                                                                                                                                                                                                                                                                                                                                                                                                                                                                                                                                                                                                                                                                                                                                                                                                                                     |
| <p>&gt;OTU101<br/>                 TACCCGCGCCCGAGTGGTGGTCGATATTATTGAGCCTAAAACGTCCGTAGCCGGTCTTGTAAATCCTTGGGTAATCGACCAGCTTAACTGTTCCGAAGT<br/>                 CCGGGGAGACTGCAAGACTTGGGATCGGGAGAGGTGACAGGTAATCTTGGGGTAGGGGTAATAATCCTGTAATCCTGGAAGGACCACCGGTGGCGAAGG<br/>                 CGTCTGACTAGAACGAATCCGACGGTGGGGACGAAGCCCTGGGGCGCAAACCGG</p>                                                                                                                                                                                                                                                                                                                                                                                                                                                                                                                                                                                                                                                                                                                                                                                                                                                                                                                                                                                                                                                                                                                                                                                                                                                                                                                                                                                                                                                   |
| <p>&gt;OTU499<br/>                 TACCCGCGCCCGAGTGGTGGTCATTAATTATTGAGCTTAAAGCGTTCGTAGCCGGCCCTGTAATCCTTGGGTAATCGGACAGCTCAACTGTTCCGAATTC<br/>                 CGAGGAGACTGCAGGGTCCGGACCGGGAGAGGTTCAGGTAATCTTGGGGTAGGGGTAATAATCCTGTAATCCTGAGAGGACCACCGGTGGCGAAGGC<br/>                 GTCGAACTAGAACGGATCCGACGGTGGGGACGAAGCCCTGGGGCGCAAACCGG</p>                                                                                                                                                                                                                                                                                                                                                                                                                                                                                                                                                                                                                                                                                                                                                                                                                                                                                                                                                                                                                                                                                                                                                                                                                                                                                                                                                                                                                                                     |
| <p>&gt;OTU926<br/>                 TACCCGCGCCCGAGTGGTGGTCGATATTATTGAGCCTAAAACGTTCGTAGCCGGTCTTGTAAATCCTTGGGTAATCGGCCAGCTTAACTGTCCGAAGT<br/>                 CCGGGGAGACTGCAAGACTTGGGATCGGGAGAGGTGACAGGTAATCTTGGGGTAGGGGTAATAATCCTGTAATCCTGGAAGGACCACCGGTGGCGAAGG<br/>                 CGTCTGACTAGAACGAATCCGACGGTGGGGACGAAGCCCTGGGGCGCAAACCGG</p>                                                                                                                                                                                                                                                                                                                                                                                                                                                                                                                                                                                                                                                                                                                                                                                                                                                                                                                                                                                                                                                                                                                                                                                                                                                                                                                                                                                                                                                    |
| <p>&gt;OTU1789<br/>                 TACCCGAGCTCGAGTGGTGGTCGATATTATTGAGCCTAAAACGTCCGTAGCCGGATTCTAAATCCTTGGGTAATCGGCTAGCTTAACTAACCGAATT<br/>                 CCGAGGAGACTGTGGATCTTGGGACCGGGAGAGGTGACAGGTAATCTTGGGGTAGGGGTAATAATCCTGTAATCCTGGAAGGACCACCGGTGGCGAAGG<br/>                 CGTCTGACTAGAACGGATCCGACGGTGGGGACGAAGCCCTGGGGCGCAAACCGG</p>                                                                                                                                                                                                                                                                                                                                                                                                                                                                                                                                                                                                                                                                                                                                                                                                                                                                                                                                                                                                                                                                                                                                                                                                                                                                                                                                                                                                                                                    |
| <p>&gt;OTU2685<br/>                 TACCCGCGCCCGAGTGGTGGTCATTAATTATTGAGCTTAAAGCGTTCGTAGCCGGCCTGTAATCCTTGGGTAATCGGGCAGCTCAACTGTTCCGAATTC<br/>                 CGAGGAGACTGCAAGCTCGGGACCGGGAGAGGTTCGAGGTAATCTTGGGGTAGGGGTAATAATCCTGTAATCCTGAGAGGACCACCGGTGGCGAAGGC<br/>                 GTCGAACTAGAACGGATCCGACGGTGGGGACGAAGCCCTGGGGCGCAAACCGG</p>                                                                                                                                                                                                                                                                                                                                                                                                                                                                                                                                                                                                                                                                                                                                                                                                                                                                                                                                                                                                                                                                                                                                                                                                                                                                                                                                                                                                                                                    |
| <p>&gt;OTU16699<br/>                 TACCCGCGCCCTAGTGGTGGTCGATATTATTGAGCCTAAAACGTCCGTAGCCGGTCTTCTAAATCCTTGGGTAATCGGGCAGCTTAACTGTCCGAAGT<br/>                 CCGGGGAGACTGGGAGACTTGGGACCGGGAGAGGTGACAGGTAATCTTGGGGTAGGGGTAATAATCCTGTAATCCTGGAAGGACCACCGGTGGCGAAG<br/>                 GCGTCTGACTAGAACGGATCCGACGGTGGGGACGAAGCCCTGGGGCGCAAACCGG</p>                                                                                                                                                                                                                                                                                                                                                                                                                                                                                                                                                                                                                                                                                                                                                                                                                                                                                                                                                                                                                                                                                                                                                                                                                                                                                                                                                                                                                                                  |
| <p>&gt;OTU16700<br/>                 TACCCGCGCCCGAGTGGTGGTCGATATTATTGAGCCTAAAACGTCCGTAGCCGGTTTTGTAAATCCTTGGGTAATCGACCAGCTTAACTGTTCCGAAGT<br/>                 CCGGGGAGACTGCAAGACTTGGGATCGGGAGAGGTGACAGGTAATCTTGGGGTAGGGGTAATAATCCTGTAATCCTGGAAGGACCACCGGTGGCGAAGG<br/>                 CGTCTGACTAGAACGAATCCGACGGTGGGGACGAAGCCCTGGGGGAGCAAACCGG</p>                                                                                                                                                                                                                                                                                                                                                                                                                                                                                                                                                                                                                                                                                                                                                                                                                                                                                                                                                                                                                                                                                                                                                                                                                                                                                                                                                                                                                                                |

|                                                                                                                                                                                                                                                                                |
|--------------------------------------------------------------------------------------------------------------------------------------------------------------------------------------------------------------------------------------------------------------------------------|
| >OTU15634<br>CACCCGACGCTCAAGTGGTGGTCGATATTATTGAGCCTAAAACGTCCTAGCCGGTTTTGTAAATCCTTGGGTAAATCGACCAGCTTAACGTTCGAAGT<br>CCGGGAGACTGCAAGACTTGGGATCGGGAGAGGTGAGAGGTAATCTTGGGGTAGGGTAAATCTGTAAATCTAGAAAGGACCACCGGTGGCGAAGG<br>CGTCTACTAGAACGAATCCGACGGTGAGGGACGAAGCCCTGGGGCGCAAACCGG   |
| >OTU15741<br>TACCCGACGCCCAGTGGTGGTCATTTTTATTGAGCCTAAAGCGTCCGTAGCCGGACTAATAATCCTTGGGTAAATCGAACCGCTAACCGTTCGAATT<br>CCGGGAGACTGTAGTCTTGAACCGGAGAGGTGAGAGGTAATCTTGGGGTAGGGTAAATCTGTAAATCTCGAAGGACCACCGTGGCGAAGG<br>CGTCTGACTGAAACGGATCCGACGGTGAGGGACGAAGCCCTGGGGCGCAAACCGG        |
| >OTU17456<br>CACCCGACGCTCAAGTGGTGGCCATTTTTATTGAGCCTAAAACGTCCTAGCCGGTTTTGTAAATCCTTGGGTAAATCGACCAGCTTAACGTTCGAAGT<br>CGGGGAGACTGCAAGACTTGGGATCGGGAGAGGTGAGAGGTAATCTTGGGGTAGGGTAAATCTGTAAATCTGGAAGGACCACCGGTGGCGAAGG<br>GTCTGACTAGAACGGATCCGACGGTGAGGGACGAAGCCCTGGGGCGCAAACCGG    |
| >OTU17598<br>TACCCGACGCTCGAGTGGTATCATTTTTACTGAGCTAAAGCGTTCGTAGCCGGTCTAGTAAATCCTTGGGTAAATCGGGCAGCTTAACGTTCGAATTC<br>CGAGGGAGACTGTGGACTTGGGACCGGAAGAGGTCAAAAGTACTTCTGGGGTAGGGTAAATCTGTAAATCTCCACGAGGACTACCAGTGGCGAAGG<br>GTTTACTAGGACGGATCCAACGGTAAGGAACGAAACCCCGGGCGCAAACCGG    |
| >OTU19010<br>TACCCGCGCCCTAGTGGTGGTCGATATTATTGAGCCTAAAACGTCCTAGCCGGTCTTCTAAATCCTTGGGTAAATCGGGCAGCTTAACGTTCGAAGT<br>CCGGGAGACTGGGAGACTTGGGACCGGGAGAGGTGAGAGGTAATCTTGGGGTAGGGTAAATCTGTAAATCTGGAAGGACCACCGGTGGCGAAGG<br>CGGCTAACTGGAACGGATCCGACGGTGAGGGACGAAGCCCTGGGGCGCAAACCGG    |
| >OTU21513<br>TACCCGCGCCCTAGTGGTGGTCGATATTATTGAGCCTAAAACGTCCTAGCCGGTCTTCTAAATCCTTGGGTAAATCGGGCAGCTTAACGTTCGAAGT<br>CCGGGAGACTGGAAGACTTGGGACCGGGAGAGGTGAGAGGTAATCTTGGGGTAGGGTAAATCTGTAAATCTGGAAGGACCACCGGTGGCGAAGG<br>CGTCTGACTAGAACGGATCCGACGGTGAGGGACGAAGCCCTGGGGGAGCGAACCGG   |
| >OTU23995<br>TACCCGCGCCCTAGTGGTGGTCGATATTATTGAGCCTAAAACGTCCTAGCCGGTCTTCTAAATCCTTGGGTAAATCGGGCAGCTTAACGTTCGAAGT<br>CCGGGAGACTGGAAGACTTGGGACCGGGAGAGGTGAGAGGTAATCTTGGGGTAGGGTAAATCTGTAAATCTGGAAGGACCACCGGTGGCGAAGG<br>CGTCTGACTAGAACGGATCCGACGGTATGACAGGAAGCCGTGGGGATCAAACAGG    |
| >OTU26269<br>TACCCGACGCCCAGTGGTGGTCACTTTTTATTGAGCCTAAAAGCGTCCGTAGCCGGACAGGTAATCCTTGGGTAAATCGAACGGCTAACCGTTCGAATT<br>CCGGGAGACTGGCTGTCTTGGACCGGGAGAGGTGAGAGGTAATCTTGGGGTAGGGTAAATCTGTAAATCTCAAAGGACCACAGTGGCGAAGG<br>CGTCTGACTGAAACGGATTTGACGGTGAGGGACGAAGCCCTGGGGCGCAAACCGG    |
| >OTU28842<br>TACCCGCGCCCAAGTGGTGGTCGATATTATTGAGCCTAAAACGTCCTAGCCGGTCTTCTAAATCCTTGGGTAAATCGGGCAGCTTAACGTTCGAAGT<br>CCGGGAGACTGGCAATCTAGGACCGGGAGAGGTGAGAGGTAATCTTGGGGTAGGAGTAAATCTGTAAATCTGGAAGGACCACCGGTGGCGAAG<br>CGCTGACTAGAACGGATCCGACGGTGAGGGACGAAGCCCTGGGGCGCAAACCGG      |
| >OTU28843<br>TACCCGCGCCCAAGTGGTGGTCGATATTATTGAGCCTAAAACGTCCTAGCCGGTTTTGTAAATCCTTGGGTAAATCGACCAGCTTAACGTTCGAAGT<br>CCGGGAGACTGCAAGACTTGGGATCGGGAGAGGTGAGAGGTAATCTTGGGGTAGGGTAAATCTGTAAATCTGGAAGGACCACCGGTGGCGAAGG<br>CGTCTACTAGAACGAATCCGACGGTGAGGAACGAAGCCAGGGCGCGAACCGG       |
| >OTU28844<br>TACCCGCGCCCGAGTGGTGGTCGATATTATTGAGCCTAAAACGTCCTAGCCGGTTTTGTAAATCCTTGGGTAAATCGACCAGCTTAACGTTCGAAGT<br>CCGGGAGACTGCAAGACTTGGGATCGGGAGAGGTGAGAGGTAATCTTGGGGTAGGGTAAATCTGTAAATCTAGAAAGGACCACCGGTGGCGAAGG<br>CGTCTACTAGAACGAATCCGACGGTGAGGGACGAAGCCCTGGGGCGCAAACCGG    |
| >OTU28845<br>TACCCGCGCCCGAGTGGTGGTCGATATTATTGAGCCTAAAACGTCCTAGCCGGTTTTGTAAATCCTTGGGTAAATCGACCAGCTTAACGTTCGAAGT<br>CCGGGAGACTGGAAGACTTGGGACCGGGAGAGGTGAGAGGTAATCTTGGGGTAGGGTAAATCTGTAAATCTGGAAGGACCACCGGTGGCGAAGG<br>CGGCTAACTGGAACGAACCTGACGGTGAGTAACGAAGCCAGGGCGCGAACCGG      |
| >OTU30110<br>CACCCGACGCTCAAGTGGTGGTCGATATTATTGAGCCTAAAACGTCCTAGCCGGTCTTCTAAATCCTTGGGTAAATCGGGCAGCTTAACGTTCGAAGTCCG<br>GGGAGACTGGAAGACTTGGGACCGGGAGAGGTGAGAGGTAATCTTGGGGTAGGGTAAATCTGTAAATCTGGAAGGACCACCGGTGGCGAAGGCGT<br>CTGACTAGAACGGATCCGACGGTGAGGGACGAAGCCCTGGGGCGCAAACCGG  |
| >OTU30122<br>TACCCGCGCCCTAGTGGTGGTCGATATTATTGAGCCTAAAACGTCCTAGCCGGTCTTCTATCTTGGGTAAATCGGGCAGCTTAACGTTCGAAGTCCG<br>GGGAGACTGGGAGACTTGGGACCGGGAGAGGTGAGAGGTAATCTTGGGGTAGGGTAAATCTGTAAATCTAGAAAGGACCACCGGTGGCGAAGGCGT<br>CTGACTAGAACGAATCCGACGGTGAGGAACGAAGCCCTGGGGCGCAAACCGG     |
| >OTU32864<br>TACCCGACGCCCAGTGGTGGTCACTTTTTATTGAGCCTAAAGCGTTCGTAGCCGGATTGGTAAATCTTGGGGAAATCGAGCGGCTCAACCGTTCGAATT<br>CCGAAGACTGCAATCTTGGGACCGGGAGAGGTGAGGTAATCTTGGGGTAGGGTAAATCTGTAAATCTCGAAGGACCACCGTGGCGAAGG<br>CGTCAGACTGAAACGGATCCGACGGTGAGGGACGAAGCCCTGGGGCGCAAACCGG       |
| >OTU32865<br>TACCCGACGCTCGAGTGGTGGTCATTTTTATTGAGCCTAAAGCGTTCGTAGCCGGTCCAGTAAATCCTTGGGTAAATCGGGCAGCTTAACGTTCGAATTC<br>CGAGGGAGACTGTGGACTTGGGACCGGAAGAGGTCAAAAGTACTTCTGGGGTAGGGTAAATCTGTAAATCTCCACGAGGACTACCAGTGGCGAAGG<br>GTTTACTAGGACGGATTCGACGGTAAGGAACGAAACCCCGGTTCGCAAACCGG |
| >OTU32869<br>TACCCGCGCCCAAGTGGTGGTCGATATTATTGAGCCTAAAACGTCCTAGCCGGTCTTCTAAATCCTTGGGCAAATCGGGCAGCTTAACGTTCGAAGT<br>CCGGGAGACTGGGAGACTTGGGACCGGGAGAGGTGAGAGGTAATCTTGGGGTAGGGTAAATCTGTAAATCTGGAAGGACCACCGGTAGCGAAGG<br>CGTCTGACTAGGACGGATCCGACGGTGAGGGACGAAGCCCTGGGGCGCAAACCGG    |
| >OTU32875<br>TACCCGCGCCCTAGTGGTGGTCAATATTATTGAGCCTAAAACGTCCTAACCCTTCTTAAATCCTTGGGTAAATCGGGCAGCTTAACGTTCGAAGT<br>CCGGGAGACTGGGAGACTTGGGACCGGGAGAGGTGAGAGGTAATCTTGGGGTAGGGTAAATCTGTAAATCTGGAAGGACCACCGGTGGCGAAGG<br>CGTCTGACTAGAACGGATCCGACGGTGAGGGACGAAGCCCTGGGGCGCAAACCGG      |
| >OTU32876<br>TACCCGCGCCCTAGTGGTGGTCGATATTATTGAGCCTAAAACGTCCTAGCCGGATTCATAATCCTTGGGTAAATCGGGTAGCTTAACCTAACCGAATT<br>CCGAGGAGACTGTGGATCTTGGGACCGGGAGAGGTGAGAGGTAATCTTGGGGTAGGGTAAATCTGTAAATCTAGAAAGGACCACCGGTGGCGAAGG<br>CGTCTGACTAGAACGGATCCGACGGTGAGGGACGAAGCCCTGGGGCGCAAACCGG |



|                                                                                                                                                                                                                                                                                                |
|------------------------------------------------------------------------------------------------------------------------------------------------------------------------------------------------------------------------------------------------------------------------------------------------|
| <p>&gt;OTU32879<br/>TACCCGCGCCCTAGTGGTGGTCGATATTATTGAGCCTAAAACGTCCGTAGCCGGTCTTCTAAATCCTTGGGTAATCGGGCAGCTTAAGTGTCCGAAGTC<br/>CGGGGAGACTGCAAGACTTGGGATCGGGAGAGGTGAGAGGTACTTCTGGGGTAGGGGTAATAATCCTGTAATCTAGAAGGACCACCGGTGGCGAAGGC<br/>GTCTCACTAGAACGAATCCGACGGTGAGGGACGAAGCCTGGGGGACAAACCGG</p>   |
| <p>&gt;OTU32880<br/>TACCCGCGCCCTAGTGGTGGTCGATATTATTGAGCCTAAAACGTCCGTAGCCGGTCTTCTAAATCCTTGGGTAAGTCGGGCAGCTTAAGTGTCCGAAGT<br/>CCGGGAGACTGGGAGACTTGGGACCGGGAGAGGTGAGAGGTACTTCTGGGGTAGGGGTAATAATCCTGTAATCTGGAAGGCGCCGGTGGCGAAGG<br/>CGTCTGACTAGAACGGATCCGACGGTGAGGGACGAAGCCTGGGGCGCAAACCGG</p>     |
| <p>&gt;OTU32881<br/>TACCCGCGCCCTAGTGGTGGTCGATATTATTGAGCCTAAAACGTCCGTAGCCGGTTTTGTAAATCCTTGGGTAATCGACCAGCTTAAGTGTCCGAAGTC<br/>CGGGGAGACTGCAAGACTTGGGATCGGGAGAGGTGAGAGGTACTTCTGGGGTAGGGGTAATAATCCTGTAATCTAGAAGGACCACCGGTGGCGAAGGC<br/>GTCTCACTAGAACGAATCCGACGGTGAGGGACGAAGCCTGGGGGACAAACCGG</p>   |
| <p>&gt;OTU32895<br/>TACCCGCGCCCGAGTGGTGGTCGATATTATTGAGCCTAAAACGTCCGTAGCCGGTTTTGTAAATCCTTGGGTAATCGACCAGCTTAAGTGTCCGAAGT<br/>CCGGGAGACTGCAAGACTTGGGATCGGGAGAGGTGAGAGGTACTTCTGGGGTAGGGGTAATAATCCTGTAATCTGGAAGGACCACCGGTGGCGAAGG<br/>CGTCTGACTAGAACGGATCCGACGGTGAGGGCGCAAAGCCTGGGGGACAAACAGG</p>   |
| <p>&gt;OTU32903<br/>TACCCGCGGCTCGAGTGGTGGCCACTATTACTGGGCTAAAGCGTCCGTAGCCGGTTTTGTAAATCCTTGGGTAATCGACCAGCTTAAGTGTCCGAAGT<br/>CCGGGAGACTGCAAGACTTGGGATCGGGAGAGGTGAGAGGTACTTCTGGGGTAGGGGTAATAATCCTGTAATCTGGAAGGACCACCGGTGGCGAAGG<br/>CGTCTGACTAGAACGGATCCGACGGTGAGGGACGAAGCCTGGGGCGCAAACCGG</p>    |
| <p>&gt;OTU33783<br/>TACGGAGGATCCGACGGTGGTCGATATTATTGAGCCTAAAACGTCCGTAGCCGGTTTTGTAAATCCTTGGGTAATCGACCAGCTTAAGTGTCCGAAGT<br/>CCGGGAGACTGCAAGACTTGGGATCGGGAGAGGTGAGAGGTACTTCTGGGGTAGGGGTAATAATCCTGTAATCTAGAAGGACCACCGGTGGCGAAGG<br/>CGTCTCACTAGAACGAATCCGACGGTGAGGGACGAAGCCTGGGGCGCAAACCGG</p>    |
| <p>&gt;OTU34173<br/>TACGGAGGATCCGAGTGGTGGTCGATATTATTGAGCCTAAAACGTCCGTAGCCGGTTTTGTAAATCCTTGGGTAATCGACCAGCTTAAGTGTCCGAAGT<br/>CCGGGAGACTGCAAGACTTGGGATCGGGAGAGGTGAGAGGTACTTCTGGGGTAGGGGTAATAATCCTGTAATCTGGAAGGACCACCGGTGGCGAAGG<br/>CGTCTGACTAGAACGGATCCGACGGTGAGGGACGAAGCCTGGGGCGCAAACCGG</p>   |
| <p>&gt;OTU40076<br/>TTAGAAACCCGCGCCCGAGTGGTGGTCGATATTATTGAGCCTAAAACGTCCGTAGCCGGTCTTCTAAATCCTTGGGTAATCGGGCAGCTTAAGTGTCC<br/>GAAGTCCGGGAGACTGGGAGACTTGGGACCGGGAGAGGTGAGAGGTACTTCTGGGGTAGGGGTAATAATCCTGTAATCTGGAAGGACCACCGGTGGC<br/>GAAGCGCTGACTAGAACGGATCCGACGGTGAGGGACGAAGCCTGGGGCGCAAACCGG</p> |
| <p>&gt;OTU40952<br/>AACCAGCTCTCGAGTGGTGGTCATGATTATTGAGCTTAAAGCGTTCGTAGCCGGCCCTGTAATCCTTGGGTAATCGGACAGCTCAAGTGTCCGAATTC<br/>CGAGGAGACTGCAGGGCTCGGGACCGGGAGAGGTGAGAGGTACTTCTGGGGTAGGGGTAATAATCCTGTAATCTGAGAGGACCACAGTGGCGAAGGC<br/>GTGCAACTAGAACGGATCCGACGGTGAGGGACGAAGCCTGGGGCGCAAACCGG</p>     |
| <p>&gt;OTU41089<br/>CACCCGCAACTCAAGTGGTGGCCATTTTTATTGAGCCTAAAACGTCCGTAGCCGGTCTTCTAAATCCTTGGGTAATCGACCAGCTTAAGTGTCCGAAGT<br/>CCGGGAGACTGCAAGACTTGGGATCGGGAGAGGTGAGAGGTACTTCTGGGGTAGGGGTAATAATCCTGTAATCTAGAAGGACCACCGGTGGCGAAGG<br/>CGTCTCACTAGAACGAATCCGACGGTGAGGGACGAAGCCTGGGGCGCAAACCGG</p>   |
| <p>&gt;OTU42355<br/>TACCCGCGCCCGAGTGGTGGTCGATATTATTGAGCCTAAAACGTCCGTAGCCGGTCTTCTAAATCCTTGGGAAATCTGCGGCTTAACCGACAGCGGTT<br/>TAAGGATACTGGCAATCTAGGACCGGGAGAGGTGAGAGGTACTTCTGGGGTAGGGGTAATAATCCTGTAATCTGGAAGGACCACCGGTGGCGAAGG<br/>CGTCTGACTAGAACGGATCCGACGGTGAGGGACGAAGCCTGGGGCGCAAACCGG</p>     |
| <p>&gt;OTU42356<br/>TACCCGCGCCCGAGTGGTGGTCGATATTATTGAGCCTAAAACGTCCGTAGCCGGTCTTCTAAATCCTTGGGTAATCTACAGCTTAAGTGTCCGAAGTC<br/>CGGGGAGACTGCAAGACTTGGGATCGGGAGAGGTGAGAGGTACTTCTGGGGTAGGGGTAATAATCCTGTAATCTAGAAGGACCACCGGTGGCGAAGGC<br/>GTCTCACTAGAACGAATCCGACGGTGAGGGACGAAGCCTGGGGCGCAAACCGG</p>    |
| <p>&gt;OTU42357<br/>TACCCGCGCCCGAGTGGTGGTCGATATTATTGAGCCTAAAACGTCCGTAGCCGGTCTTCTAAATCCTTGGGTAATCGACCAGCTTAAGTGTCCGAAGT<br/>CCGGGAGACTGCAAGACTTGGGATCGGGAGAGGTGAGAGGTACTTCTGGGGTAGGGGTAATAATCCTGTAATCTGGAAGGACCACCGGTGGCGAAGG<br/>CGTCTGACTAGAACGGATCCGACGGTGAGGGACGAAGCCTGGGGTCAAACAGG</p>     |
| <p>&gt;OTU42358<br/>TACCCGCGCCCGAGTGGTGGTCGATATTATTGAGCCTAAAACGTCCGTAGCCGGTCTTCTAAATCCTTGGGTAATCGGGCAGCTTAAGTGTCCGAAGT<br/>CCGGGAGACTGGAAGACTTGGGACCGGGAGAGGTGAGAGGTACTTCTGGGGTAGGGGTAATAATCCTGTAATCTAGAAGGACCACCGGTGGCGAAGG<br/>CGTCTCACTAGAACGAATCCGACGCTGAGGGCGCAAAGCCTGGGGGACAAACAGG</p>   |
| <p>&gt;OTU42363<br/>TACCCGCGCCCGAGTGGTGGTCGATATTATTGAGCCTAAAACGTCCGTAGCCGGTCTTCTAAATCCTTGGGTAATCGGGCAGCTTAAGTGTCCGAAGT<br/>CCGGGAGACTGGGAGACTTGGGACCGGGAGAGGTGAGAGGTACTTCTGGGGTAGGGGTAATAATCCTGTAATCTGGAAGGACCACCGGTGGCGTAGG<br/>CGTCTACCAGAACGGCTCCGACAGTGAGGGACGAAGCCTGGGGCGCAAACCGG</p>     |
| <p>&gt;OTU42365<br/>TACCCGCGCCCTAGTGGTGGTCGATATTATTGAGCCTAAAACGTCCGTAGCCGGTCTTCTAAATCCTTGGGTAATCGGGCAGCTTAAGTGTCCGAAGT<br/>CCGGGAGACTGGAAGACTTGGGACCGGGAGAGGTGAGAGGTACTTCTGGGGTAGGGGTAATAATCCTGTAATCTGGAAGGACCACCGGTGGCGAAGG<br/>CGTCTGACTAGAACGGATCCGACGGTGAGGGACGAAGCCTGGGGCGCAAACCGG</p>    |
| <p>&gt;OTU42368<br/>TACCCGCGCCCAAGTGGTGGTCGATATTATTGAGCCTAAAACGTCCGTAGCCGGTTTTGTAAATCCTTGGGTAATCGACCAGCTTAAGTGTCCGAAGT<br/>CCGGGAGACTGCAAGACTTGGGATCGGGAGAGGTGAGAGGTACTTCTGGGGTAGGGGTAATAATCCTGTAATCTGGAAGGACCACCGGTGGCGAAGG<br/>CGTCTGACTAGAACGGATCCGACGGTGAGGGACGAAGCCTGGGGTCAAACAGG</p>     |
| <p>&gt;OTU42371<br/>TACCCGCGCCCGAGTGGTGGTCGATATTATTGAGCCTAAAACGTCCGTAGCCGGTTTTGTAAATCCTTGGGTAATCGACCAGCTTAAGTGTCCGAAGT<br/>CCGGGAGACTGCAAGACTTGGGATCGGGAGAGGTGAGAGGTACTTCTGGGGTAGGGGTAATAATCCTGTAATCTAGAAGGACCACCGGTGGCGAAGG<br/>CGTCTACCAGAACGGCTCCGACAGTGAGGGACGAAGCCTGGGGCGCAAACCGG</p>     |
| <p>&gt;OTU45367<br/>TAGCTAGGGGGCAGCGTTATCCGAATTATTGAGCCTAAAACGTCCGTAGCCGGTCTTCTAAATCCTTGGGTAATCGGGCAGCTTAAGTGTCCGAAGT<br/>CCGGGAGACTGGGAGACTTGGGACCGGGAGAGGTGAGAGGTACTTCTGGGGTAGGGGTAATAATCCTGTAATCTGGAAGGACCACCGGTGGCGAAGG<br/>CGTCTGACTAGAACGGATCCGACGGTGAGGGACGAAGCCTGGGGCGCAAACCGG</p>     |

|                                                                                                                                                                                                                                                                                |
|--------------------------------------------------------------------------------------------------------------------------------------------------------------------------------------------------------------------------------------------------------------------------------|
| >OTU47307<br>TACCCGCGCCCTAGTGGTGGTCGATATTATTGAGCCTAAAACGTCCTAGCCGGTCTTCTAAATCCTTGGGTAATCGGGCAGCTTAACGTGGGAATT<br>GCTGGAGATACTATTAGGCTTAGGTCGGGAGAGGTTAGCCGTAATCCAGGGTAGGGTAAATCCTATAATCCTGGGAGGACCACCGGTGGCGAAG<br>GCGTCTGACTAGAACGGATCCGACGGTGAGGGACGAAGCCCTGGGGCGCAAACGGG    |
| >OTU50349<br>TACCCGCGCCCGAGTGGTGGTCGATATTATTGAGCCTAAAACGTCCTAGCCGGTCTTCTAAATCCTTGGGTAATCGGGCAGCTTAACGTGGGAAGT<br>CCTGGGAGACTTGGGACCGGGAGAGGTCAGAGGTAATCTTGGGGTAGGGTAAATCCTGTAATCCTGGAAGGACCACCGGTGGCGAAGCGTCTGAC<br>TAGAACGGATCCGACGGTGAGGGACGAAGCCCTGGGGCGCAAACGGG            |
| >OTU93191<br>CACCCGAGCTCAAGTGGTGGCCATTATTATTGAGCCTAAAACGTCCTAGCCGGTCTTCTAAATCCTTGGGTAATCGGGCAGCTTAACGTGGGAAGT<br>CCGGGAGACTGGAAGACTTGGGACCGGGAGAGGTCAGAGGTAATCTTGGGGTAGGGTAAATCCTGTAATCCTAGAAGGACCACCGGTGGCGAAGG<br>CGTCTACTAGAACGAATCCGACGGTGAGGGACGAAGCCCTGGGGCGCAAACGGG     |
| >OTU93217<br>CACCCGAGCTCAAGTGGTGGCCATTTTATTGAGCCTAAAACGTCCTAGCCGGTCTTCTAAATCCTTGGGTAATCGGGCAGCTTAACGTGGGAAGT<br>CCGGGAGACTTGGGAGACTTGGGACCGGGAGAGGTCAGAGGTAATCTTGGGGTAGGGTAAATCCTGTAATCCTGGAAGGACCACCGGTGGCGAAGG<br>CGTCTACTAGAACGGATCCGACAGTGAGGGACAAAAGCTGGGGGAGCAAACGGG     |
| >OTU93532<br>CACCCGCGCCCGAGTGGTGGTCGATATTATTGAGCCTAAAACGTCCTAGCCGGTCTTGTAAATCCTTGGGTAATCGACCAGCTTAACGTGGGAAGT<br>CCGGGAGACTGCAAGACTTGGGATCCGGGAGAGGTCAGAGGTAATCTTGGGGTAGGGTAAATCCTGTAATCCTAGAAGGACCACCGGTGGCGAAGG<br>CGTCTACTAGAACGAATCCGACGGTGAGGGACGAAGCCCTGGGGCGCAAACGGG    |
| >OTU93561<br>CACCCGCGCCCGAGTGGTGGTCGATATTATTGAGCCTAAAACGTCCTAGCCGGTCTTGTAAATCCTTGGGTAATCGACCAGCTTAACGTGGGAAGT<br>CCGGGAGACTGCAAGACTTGGGATCCGGGAGAGGTCAGAGGTAATCTTGGGGTAGGGTAAATCCTGTAATCCTAGAAGGACCACCGGTGGCGAAGG<br>CGTCTACTAGAACGAATCCGACGGTGAGGGACGAAGCCCTGGGGCGCAAACGGG    |
| >OTU137628<br>TACCCGCGCCCAAGTGGCGTGGTCGATATTATTGAGCCTAAAACGTCCTAGCCGGTCTTCTAGATCCTTGGGTAATCGGGCAGCTCAACTGTCCGAATT<br>CCGGGAGACTGGGAGACTTGGGACCGGGAGAGGTCAGAGGTAATCTTGGGGTAGGGTAAATCCTGTAATCCTGGAAGGACCACCGGTGGCGAAGG<br>CGTCTACTAGAACGGATCCGACGGTGAGGGACGAAGCCCTGGGGCGCAAACGGG |
| >OTU137784<br>TACCCGCGCCCAAGTGGTGGTCGATATTATTAAGCCTAAAACGTCCTAGCCGGTCTTCTAGATCCTTGGGTAATCGGGCAGCTCAACTGTCCGATT<br>CCGGGAGACTGGGAGACTTGGGACCGGGAGAGGTCAGAGGTAATCTTGGGGTAGGGTAAATCCTGTAATCCTGGAAGGACCACCGGTGGCGAAGG<br>CGTCTACTAGAACGGATCCGACGGTGAGGGACGAAGCCCTGGGGCGCAAACGGG    |
| >OTU138153<br>TACCCGCGCCCAAGTGGTGGTCGATATTATTGAGCCTAAAACGTCCTAGCCGGTCTTCTAAATCCTTGGGTAATCGGGCAGCTTAACGTGGGAAGT<br>CCGGGAGACTGGGAGACTTGGGACCGGGAGAGGTCAGAGGTAATCTTGGGGTAGGGGAAAATCCTGTAATCCTGGAAGGACCACCGGTGGCGAAG<br>GCGTCTACTAGAACGGATCCGATGGGGAGGGACGAAGCCCTGGGGCGCAAACGGG   |
| >OTU138161<br>TACCCGCGCCCAAGTGGTGGTCGATATTATTGAGCCTAAAACGTCCTAGCCGGTCTTCTAAATCCTTGGGTAATCGGGCAGCTTAACGTGGGAAGT<br>CCGGGAGACTGGGAGACTTGGGACCGGGAGAGGTCAGAGGTAATCTTGGGGTAGGGTAAATCCTGTAATCCTGGACGACGACCGGTGGCGAAGG<br>CGTCTACTAGAACGGAGCCGACGGTGAGGGACGAAGCCCTGGGGCGCAAACGGG     |
| >OTU138577<br>TACCCGCGCCCAAGTGGTGGTCGATCATATTGAGCCTAAAACGTCCTAGCCGGTCTTCTAAATCCTTGGGTAATCGGGCAGCTTAACGTGGGAAGT<br>CCGGGAGACTGGGAGACTTGGGACCGGGAGAGGTCAGAGGTAATCTTGGGGTAGGGTAAATCCTGTAATCCTGGAAGGACCACCGGTGGCGAAGG<br>CGTCTACTAGAACGGATCCGACGGTGAGGGACGAAGCCCTGGGGCGCAAACGGG    |
| >OTU138814<br>TACCCGCGCCCGAGTGGTGGTCGATATTATTGAGCCTAAAACGTCCTAGCCGGTCTTCTAAATCCTTGGGTAATCGGCCAGCTTAACGTACCGAATT<br>CCGGGAGACTGCCAAACTTGGGACCGGGAGAGGTCAGAGGTAATCTTGGGGTAGGGTAAATCCTGTAATCCTGGAAGGACCACCGGTGGCGAAGG<br>CGTCTAGCTAGAACGGATCCGACGGTGAGGAACGAAGCCCTGGGGCGCAAACGGG  |
| >OTU138856<br>TACCCGCGCCCGAGTGGTGGTCGATATTATTGAGCCTAAAACGTCCTAGCCGGTCTTCTAAATCCTTGGGTAATCGGGCAGCTTAACGTGGGAAGT<br>CCGGGAGACTGGAAGACTTGGGACCGGGAGAGGTCAGAGGTAATCTTGGGGTAGGGTAAATCCTGTAATCCTGGAAGGACCACCGGTGGCGAAGG<br>CGTCTACTAGAACGGATCCGGCGGTGAGGGACGAAGCCCTGGGGCGCAAACAGG    |
| >OTU139058<br>TACCCGCGCCCGAGTGGTGGTCGATATTATTGAGCCTAAAACGTCCTAGCCGGTCTTCTAAATCCTTGGGTAATCGGGCAGCTTAACGTGGGAAGT<br>CCGGGAGACTGGGAGACTTGGGACCGGGAGAGGTCAGAGGTAATCTTGGGGTAGGGTAAATCCTGTAATCCTGGAAGGACCACCGGTGGCGAAGG<br>CGTCTACTAGAACGGATCCGACGGTGAGGGACGAGCCCTGGGGCGCAAACGGG     |
| >OTU139250<br>TACCCGCGCCCTAGGGTGGTCGATATTATTGAGCCTAAAACGTCCTAGCCGGTCTTCTAAATCCTTGGGTAATCGGGCAGCTTAACGTGGGAAGT<br>CCGGGAGACTGGGAGACTTGGGACCGGGAGAGGTCAGAGGTAATCTTGGGGTAGGGTAAATCCTGTAATCCTGGAAGGACCACCGGTGGCGAAGG<br>CGTCTACTAGAACGGATCCGACGGTGAGGGACGAAGCCCTGGGGCGCAAACGGG     |
| >OTU139311<br>TACCCGCGCCCTAGTGGTGGTCGATATTATTGAGCCTAAAACGTCCTAGCCGGTCTTCTAAATCCTTGGGTAATCGGGCAGCTTAACGTGGGAAGT<br>CCGGGAGACTGGGAGACTTGGGACCGGGAGAGGTCAGAGGTAATCTTGGGGTAGGGTAAATCCTGTAATCCTGGAAGGACCACCGGTGGCGAAGG<br>CGTCTACTAGAACGGATCCGACGGTGAGGGACGAAGCCCTGGGGCGCAAACGGG    |
| >OTU139582<br>TACCCGCGCCCTAGTGGTGGTCGATATTATTGAGCCTAAAACGTCCTAGCCGGTCTTCTAAATCCTTGGGTAATCGGGCAGCTTAACGTGGGAAGT<br>CCGGGAGACTGGAAGACTTGGGACCGGGAGAGGTCAGAGGTAATCTTGGGGTAGGGTAAATCCTGTAATCCTGGGAGGACCACCTGTGGCGAAGG<br>CGGTAACCTGGAACGGATCCGACGGTGAGGGACGAAGCCCTGGGGCGCAAACGGG   |
| >OTU139596<br>TACCCGCGCCCTAGTGGTGGTCGATATTATTGAGCCTAAAACGTCCTAGCCGGTCTTCTAAATCCTTGGGTAATCGGGCAGCTTAACGTGGGAAGT<br>CCGGGAGACTGGGAGACTTGGGACCGGGAGAGGTCAGAGGTAATCTTGGGGTAGGGTAAATCCTGTAATCCTGGAAGGACCACCGGTGGCGAAGG<br>CGTCTACTGGAACGGATCCGACGGTGAGGGACGAAGCCCTGGGGCGCAAACGGG    |
| >OTU139635<br>TACCCGCGCCCTAGTGGTGGTCGATATTATTGAGCCTAAAACGTCCTAGCCGGTCTTCTAAATCCTTGGGTAATCGGGCAGCTTAACGTGGGAAGT<br>CCGGGAGACTGGGAGACTTGGGACCGGGAGAGGTCAGAGGTAATCTTGGGGTAGGGTAAATCCTGTAATCCTGGAAGGACCACCGGTGGCGAAGG<br>CGTCTACTAGAACGGATCCGACGGTGAGGGACGAAGCCCTGGGGCGCAAACAGG    |

|                                                                                                                                                                                                                                                                                     |
|-------------------------------------------------------------------------------------------------------------------------------------------------------------------------------------------------------------------------------------------------------------------------------------|
| >OTU139663<br>TACCCGCGCCCCTAGTGGTGGTCGATATTATTGAGCCTAAAACGTCCGTAGCCGGTCTTCTAAATCCTTGGGTAATCAGGCAGCTTAAGTGTCCGAAGT<br>CCGGGAGACTGGGAGACTTGGGACCGGGAGAGGTCAGTGGTACTTCTGGGGTAGGGGTAATAATCCTGTAATCCTGGAAGGACCACCGGTGGCGAAGG<br>CGTCTGACTAGAACGGATCCGACGGTGAGGGACGAAGCCCTGGGGCGCAAACAGG  |
| >OTU139667<br>TACCCGCGCCCCTAGTGGTGGTCGATATTATTGAGCCTAAAACGTCCGTAGCCGGTCTTCTAAATCCTTGGGTAATCAGGCAGCTTAAGTGTCCGAAGT<br>CCGGGAGACTGGGAGACTTGGGACCGGGAGAGGTCAGAGGTACTTCTGGGGTAGGGGTAATAATCCTGTAATCCTGGAAGGACCACCGGTGGCGAAGGC<br>GTCTGACTAGAACGGATCCGACGGTGAGGGACGAAGCCCTGGGGCGCAAACAGG  |
| >OTU139671<br>TACCCGCGCCCCTAGTGGTGGTCGATATTATTGAGCCTAAAACGTCCGTAGCCGGTCTTCTAAATCCTTGGGTAATCAGGCAGCTTAAGTGTCCGAATTC<br>CGAGGAGACTGTGGATCTTGGGACCGGGAGAGGTCAGAGGTACTTCTGGGGTAGGGGTAATAATCCTGTAATCCTAGAAGGACCACCGGTGGCGAAGGC<br>GTCTGACTAGAACGGATCCGACGGTGAGGGACGAAGCCCTGGGGCGCAAACAGG |
| >OTU139707<br>TACCCGCGCCCCTAGTGGTGGTCGATATTATTGAGCCTAAAACGTCCGTAGCCGGTCTTCTAAATCCTTGGGTAATCAGGCAGCTTAAGTGTCCGAAGT<br>CCGGGAGACTGGGAGACTTGGGACCGGGAGAGGTCAGAGGTACTTCTGGGGTAGGGGTAATAATCCTGTAATCCTGGAAGGACCACCGGTGGCGAAG<br>GCGTCTACTAGAACGAATCCGACGGTGAGGGACGAAGCCCTGGGGCGCAAACAGG   |
| >OTU139710<br>TACCCGCGCCCCTAGTGGTGGTCGATATTATTGAGCCTAAAACGTCCGTAGCCGGTCTTCTAAATCCTTGGGTAATCAGGCAGCTTAAGTGTCCGAAGT<br>CCGGGAGACTATTAGCCTTGGGACCGGGAGAGGTCAGAGGTACTTCTGGGGTAGGGGTAATAATCCTGTAATCCTGGAAGGACCACCGGTGGCGAAGG<br>CGTCTGACTAGAACGGATCCGACGGTGAGGGACGAAGCCCTGGGGCGCAAACAGG  |
| >OTU139763<br>TACCCGCGCCCCTAGTGGTGGTCGATATTATTGAGCCTAAAACGTCCGTAGCCGGTCTTCTAAATCCTTGGGTAATCAGGCAGCTTAAGTGTCCGAAGT<br>CCGGGAGACTTGAAGACTTGGGACCGGGAGAGGTCAGAGGTACTTCTGGGGTAGGGGTAATAATCCTGTAATCCTGGAAGGACCACCGGTGGCGAAGG<br>CGGTAAGTGAACGGACCTGACGGTGAGTAACGAAGCCCTGGGGCGCAAACAGG    |
| >OTU139857<br>TACCCGCGCCCCTAGTGGTGGTCGATATTATTGAGCCTAAAACGTCCGTAGCCGGTCTTCTAAATCCTTGGGTAATCAGGCAGCTTAAGTGTCCGAAGT<br>CCGGGAGACTGGGAGACTTGGGACCGGGAGAGGTCAGAGGCATCTTCTGGGGTAGGGGTAATAATCCTGTAATCCTGGAAGGACCACCGGTGGCGAAG<br>GCGTCTGACTAGAACGGATCCGACGGTGAGGGACGAAGCCCTGGGGCGCAAATAGG |
| >OTU139866<br>TACCCGCGCCCCTAGTGGTGGTCGATATTATTGAGCCTAAAACGTCCGTAGCCGGTCTTCTAAATCCTTGGGTAATCAGGCAGCTTAAGTGTCCGAAGT<br>CCGGGAGACTGGGAGACTTGGGACCGGGAGAGGTCAGAGGTACTTCTGGGGGAGGAGTAATAATCCTGTAATCCTAGAAGGACCACCGGTGGCGAAG<br>GCGTCTACTAGAACGAATCCGACGGTGAGGGACGAAGCCCTGGGGCGCAAACAGG   |
| >OTU139868<br>TACCCGCGCCCCTAGTGGTGGTCGATATTATTGAGCCTAAAACGTCCGTAGCCGGTCTTCTAAATCCTTGGGTAATCAGGCAGCTTAAGTGTCCGAAGT<br>CCGGGAGACTGGGAGACTTGGGACCGGGAGAGGTCAGAGGTACTTCTGGGGTAGGGGTAATAATCCTGTAATCCTGGAAGGACCACCGGTGGCGAAG<br>GCGTCTGACTAGAGCGGATCCGACGGGGAGGGACGAAGCCCTGGGGCGCAAACAGG  |
| >OTU139872<br>TACCCGCGCCCCTAGTGGTGGTCGATATTATTGAGCCTAAAACGTCCGTAGCCGGTCTTCTAAATCCTTGGGTAATCAGGCAGCTTAAGTGTCCGAAGT<br>CCGGGAGACTGGGAGACTTGGGACCGGGAGAGGTCAGAGGTACTTCTGGGGTAGGGGTAATAATCCTATAATCCTGGGAGGACCACCTGTGGCGAAGG<br>CGTCTGACTAGAACGGATCCGACGGTGAGGGACGAGCCCTGGGGCGCAAACAGG   |
| >OTU139890<br>TACCCGCGCCCCTAGTGGTGGTCGATATTATTGAGCCTAAAACGTCCGTAGCCGGTCTTCTAAATCCTTGGGTAATCAGGCAGCTTAAGTGTCCGAAGT<br>CCGGGAGACTGGGAGACTTGGGACCGGGAGAGGTCAGAGGTACTTCTGGGGTAGGGGTAATAATCCTGTAATCCTGGAAGGAGCACCAGGTGGCGAAG<br>GCGTCTGACTAGAACGGATCCGACGGGGAGGGACGAAGCCCTGGGGCGCAAACAGG |
| >OTU139906<br>TACCCGCGCCCCTAGTGGTGGTCGATATTATTGAGCCTAAAACGTCCGTAGCCGGTCTTCTAAATCCTTGGGTAATCAGGCAGCTTAAGTGTCCGAAGT<br>CCGGGAGACTGGGAGACTTGGGACCGGGAGAGGTCAGGGGTACTTCTGGGGTAGGGGTAATAATCCTGTAATCCTGGAAGGACCACCGGTGGCGAAG<br>GCGTCTGACTAGAACGGACCCGACGGTGAGGGACGAAGCCCTGGGGCGCAAACAGG  |
| >OTU139935<br>TACCCGCGCCCCTAGTGGTGGTCGATATTATTGAGCCTAAAACGTCCGTAGCCGGTCTTCTAAATCCTTGGGTAATCAGGCAGCTTAAGTGTCCGAAGT<br>CCGGGAGGCTGGGAGACTTGGGACCGGGAGAGGTCAGAGGTACTTCTGGGGTAGGGGTAATAATCCTGTAATCCTGGAAGGACCACCGGTGGCGAGGG<br>CGTCTGACTAGAACGGATCCGACGGTGAGGGACGAAGCCCTGGGGCGCAAACAGG  |
| >OTU140162<br>TACCCGCGCCCCTAGTGGTGGTCGATATTATTGAGCCTAACACGTCCGAGCCGGTCTTCTACATCCTGGGTAATCAGGCAGCTTAAGTGTCCGAAGT<br>CCGGGAGACTGGAAGACTTGGGACCGGGAGAGGTCAGAGGTACTTCTGGGGTAGGGGTAATAATCCTGTAATCCTGGAAGGACCACCGGTGGCGAAG<br>GCGTCTGACTAGAACGGATCCGACGGTGAGGGACGAAGCCCTGGGGCGCAAACAGG    |
| >OTU140273<br>TACCCGCGCCCCTAGTGGTGGTCGATCCTATTGAGCCTAAAACGTCCGTAGCCGGTCTTCTAAATCCTTGGGTAATCAGGCAGCTTAAGTGTCCGAAGT<br>CCGGGAGACTGGGAGACTTGGGACCGGGAGAGGTCAGAGGTACTTCTGGGGTAGGGGTAATAATCCTGTAATCCTGGAAGGACCACCGGTGGCGAAG<br>GCGTCTGACTAGAACGGATCCGACGGTGAGGGACGAAGCCCTGGGGCGCAAACAGG  |
| >OTU140392<br>TACCCGCGCCCCTAGTGGTGGTCGATATTATTGAGCCTAAAACGTCCGTAGCCGGTCTTCTAAATCCTTGGGTAATCAGGCAGCTTAAGTGTCTAAGTC<br>CGGGGAGACTGGGAGACTTGGGACCGGGAGAGGTCAGAGGTACTTCTGGGGTAGGGGTAATAATCCTGTAATCCTGGAAGGACCACCGGTGGCGAAGGC<br>GTCTGACTAGAACGGATCAGACGGTGAGGGACGAAGCCCTGGGGCGCAAACAGG  |
| >OTU140596<br>TACCCGCGCCCCTAGTGGTGGTCGATATTATTGAGCCTAAAACGTCCGTAGCCGGTCTTCTAAATCCTTGGGTAATCAGGCAGCTTAAGTGTCCGAAGT<br>CCGGGAGACTGGAAGACTTGGGACCGGGAGAGGTCAGAGGTACTTCTGGGGTAGGGGTAATAATCCTGTAATCCTGGAAGGACCACCGGTGGCGAAGG<br>CGTCTGACTAGAACGGATCCGACGGTGAGGGACAAAGCCCTGGGGCGCAAACAGG  |
| >OTU140729<br>TACCCGCGCCCCTAGTGGTGGTCGATATTATTGAGCCTAAAACGTCCGTAGCCGGTCTTCTAAATCCTTGGGTAATCAGGCAGCTTAAGTGTCCGAAGT<br>CCGGGAGACTGCAAGACTTGGGATCCGGGAGAGGTCAGAGGTACTTCTGGGGTAGGGGTAATAATCCTGTAATCCTAGAAGGACCACCGGTGGCGAAGG<br>CGTCTACTAGAACGAATCCGACGGTGAGTAACGAAGGCCAGGGGCGCAAACAGG  |
| TU407971<br>TACCCGCGCCCCTAGTGGTGGTCGATATTATTGAGCCTAAAACGTCCGTAGCCGGTCTTCTAAATCCTTGGGTAATCAGGCAGCTTAAGTGTGGGAATT<br>GCTGGAGATACTATCAGCCTTGAAGCCGGGAGAGGTTAGGGGTACTCCAGGGTAGGGGTAATAATCCTGTAATCCTGGAAGGACCACCGGTGGCGAAG<br>GCGTCTGACTAGAACGGATCCGACGGTGAGGGACGAAGCCCTGGGGCGCAAACAGG   |

**Table S4.** Results of the quantification of *Methanomassiliicoccales* by qPCR in the different samples. Quantification is expressed as the number of copies of the target gene  $\times 10^3$  per gram of wet matrix. Legend, NQ: non-quantifiable, *i.e.* a sample with no signal or less than 3 Ct difference from the extraction control, in qPCR experiments where  $90 < \text{PCR efficiency} < 110\%$  and  $r^2$  of standard curve  $> 0.99$ ; Below the detection limit: Less than  $10^3$  gene copies per ml or gram of wet weight of sample.

| Sample | <i>Methanomassiliicoccales</i> 16S rRNA gene copies per gram of wet weight ( $\times 10^3$ ) |
|--------|----------------------------------------------------------------------------------------------|
| COMRA  | NQ                                                                                           |
| DOUR   | $6.51 \pm 4.84$                                                                              |
| HM1    | Below the detection limit                                                                    |
| HM2    | Below the detection limit                                                                    |
| HM3    | Below the detection limit                                                                    |
| HM4    | Below the detection limit                                                                    |
| KERG   | $6.41 \pm 0.93$                                                                              |
| KRY150 | Below the detection limit                                                                    |
| KRY238 | NQ                                                                                           |
| MOUG1  | $75.02 \pm 4.59$                                                                             |
| MOUG2  | $62.63 \pm 5.10$                                                                             |
| MOUG3  | $1.86 \pm 0.19$                                                                              |
| MOUG4  | Below the detection limit                                                                    |
| MOUG5  | NQ                                                                                           |
| MOZ1   | $1.62 \pm 1.02$                                                                              |
| MOZ2   | $1.76 \pm 0.5$                                                                               |
| MOZ3   | Below the detection limit                                                                    |
| PAV60  | $13.2 \pm 0.69$                                                                              |
| PAV70  | $0.45 \pm 0.18$                                                                              |
| PAV80  | $3.79 \pm 2.48$                                                                              |
| PENF   | $53.24 \pm 4.27$                                                                             |
| XIA    | Below the detection limit                                                                    |

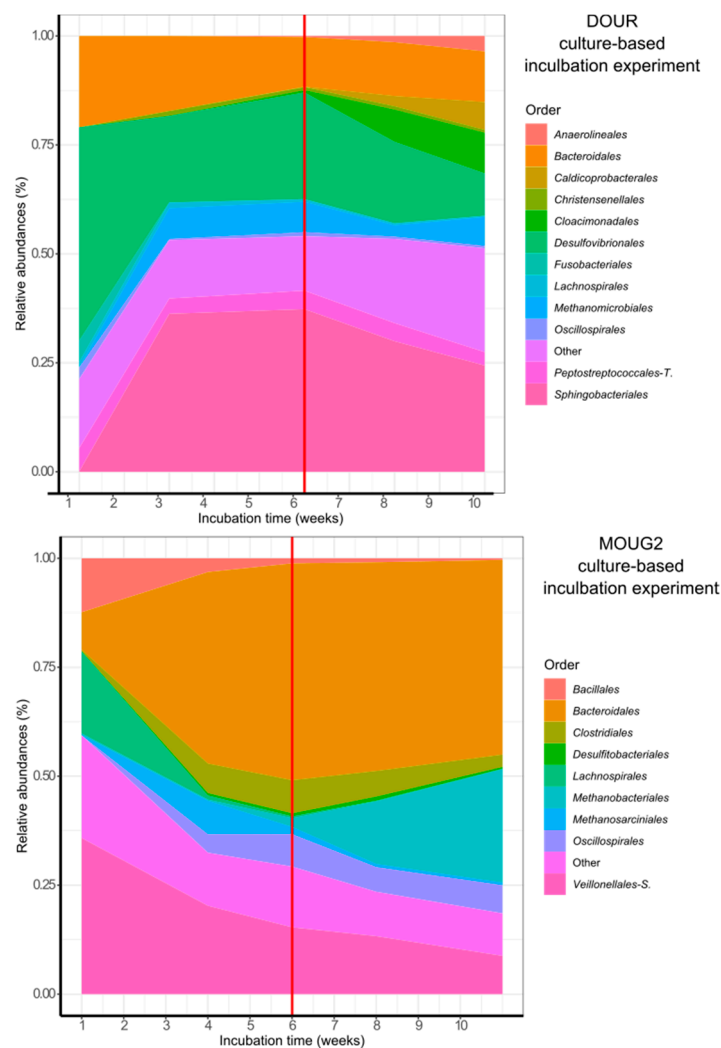

**Figure S1.** Trends in microbial diversity revealed by metabarcoding in DOUR (top) and MOUG2 (bottom) substrate-amended slurries, over time. Other: microbial diversity representing less than 5% of the sequences in the culture-based experiment.

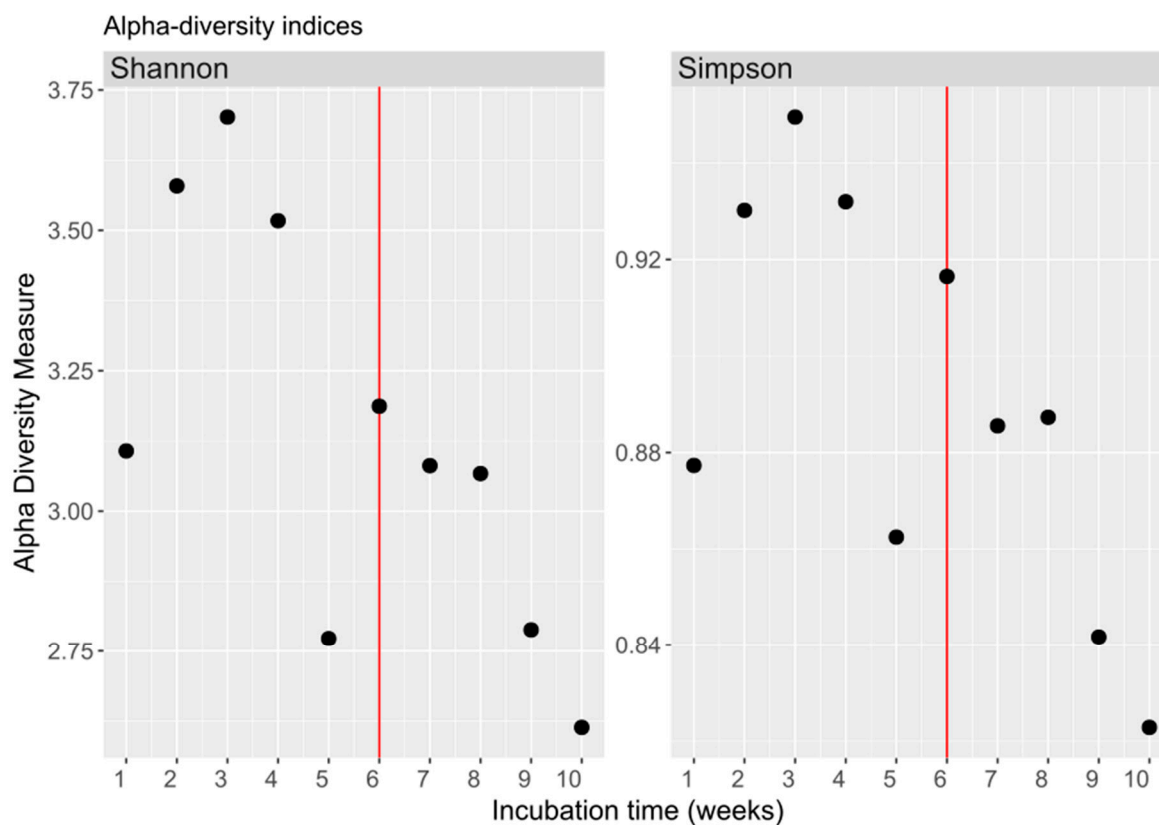

| Incubation | 1      | 2      | 3      | 4     | 5      | 6      | 7      | 8      | 9      | 10     |
|------------|--------|--------|--------|-------|--------|--------|--------|--------|--------|--------|
| Shannon    | 3.1072 | 3.5791 | 3.7017 | 3.517 | 2.7728 | 3.1868 | 3.0811 | 3.0669 | 2.7884 | 2.6138 |
| Simpson    | 0.8773 | 0.9302 | 0.9495 | 0.932 | 0.8625 | 0.9165 | 0.8855 | 0.8873 | 0.8417 | 0.8229 |

**Figure S2.** Evolution of the prokaryotic alpha-diversity during the incubation of the PENF sample, in the culture-based incubation experiment. The vertical red line indicates an addition of TMA, methanol and H<sub>2</sub>/CO<sub>2</sub> after 6 weeks of incubation.

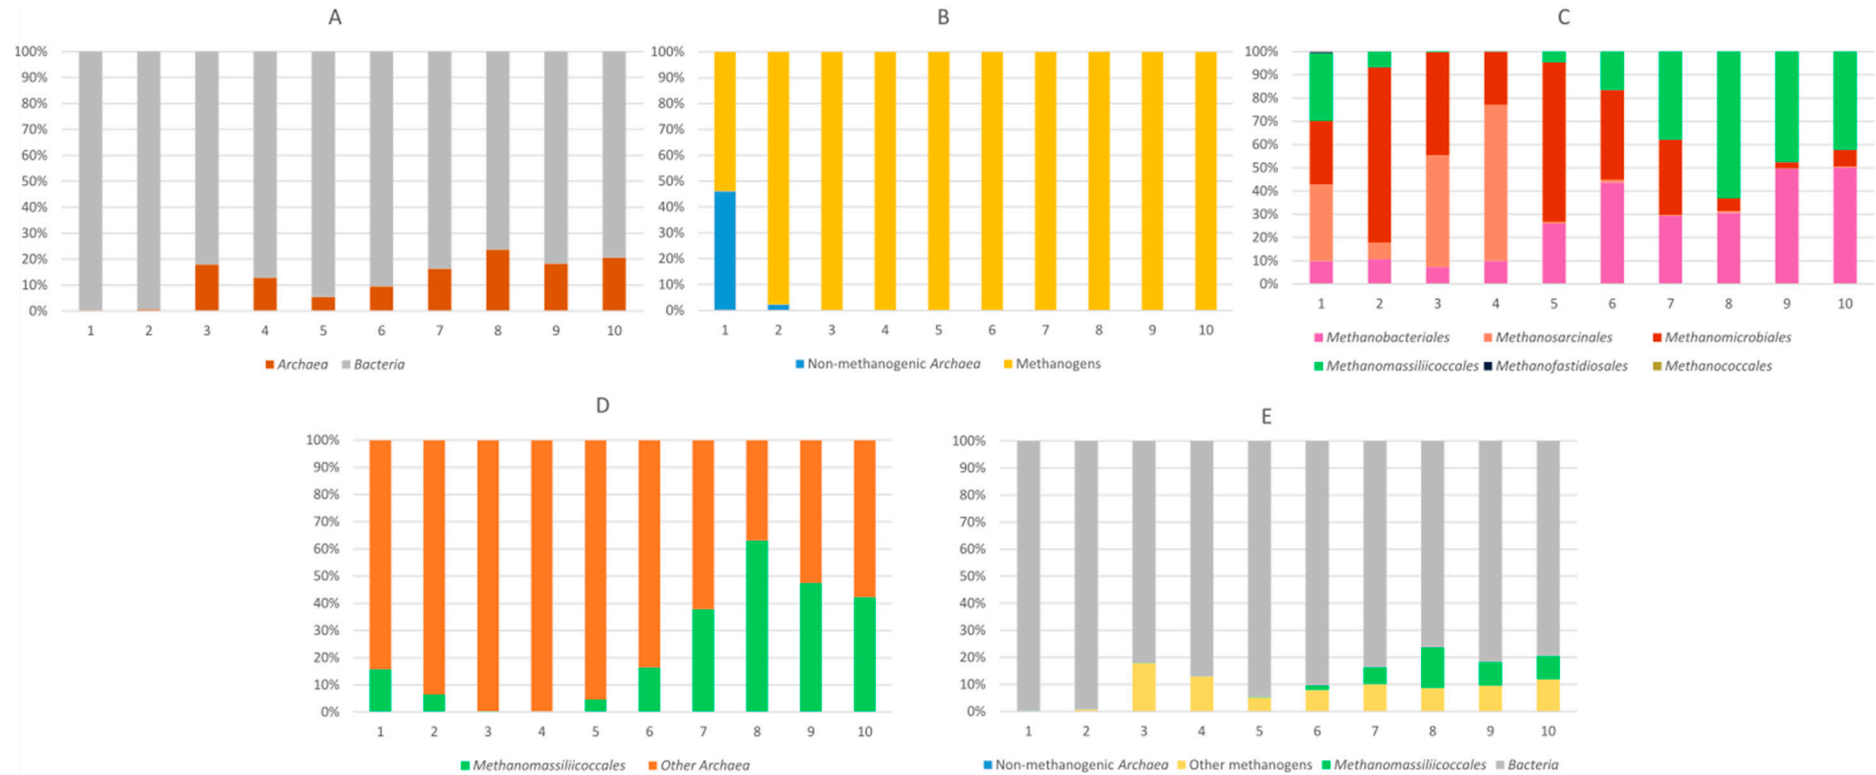

**Figure S3.** Microbial diversity patterns revealed by metabarcoding (16S rRNA gene copy numbers) in the PENF substrate-amended slurry over time. (A) Relative abundance of *Archaea* with respect to *Bacteria* sequences (B) Relative abundance of methanogen's and non-methanogen's archaeal sequence reads. (C) Relative abundance of sequences affiliated to the various methanogen's orders. (E) Relative abundance of sequences of *Methanomassiliicoccales* with respect to other *Archaea* sequences. (E) Relative abundance of *Methanomassiliicoccales* sequences with respect to non-methanogenic *Archaea*, other methanogens and *Bacteria* sequences..

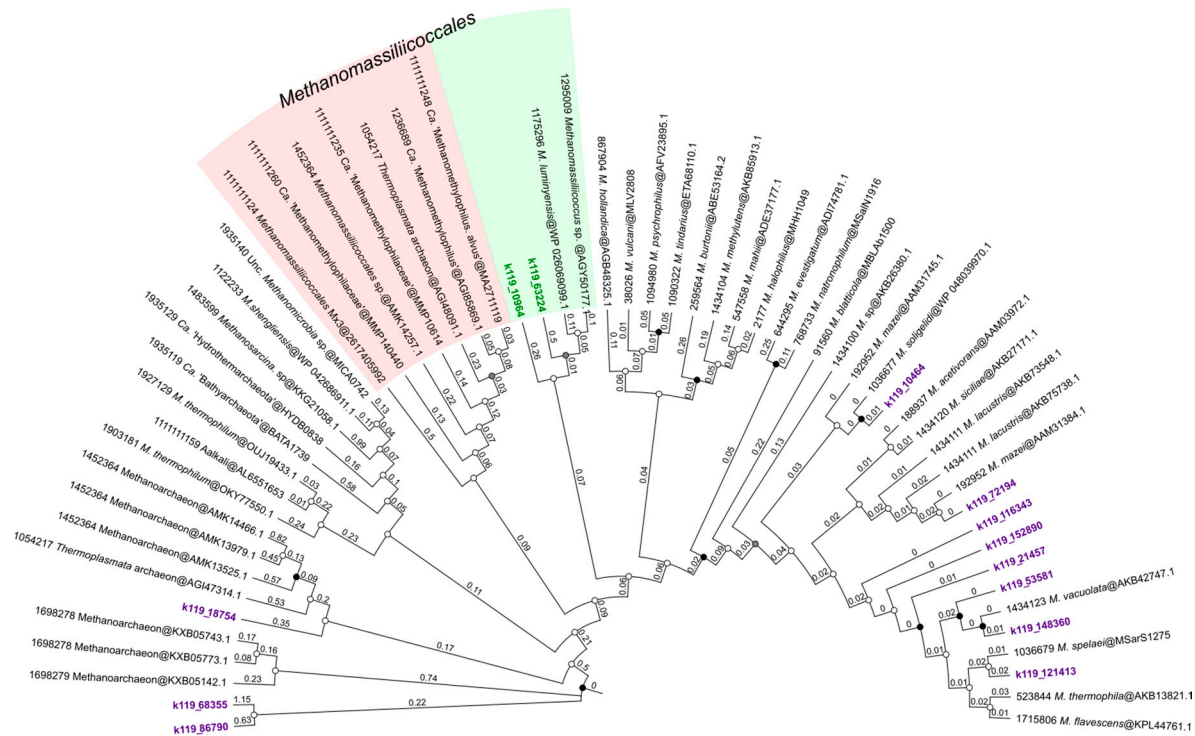

**Figure S4.** Phylogenetic tree showing the relationships between the trimethylamine methyltransferases (*mttB*) sequences extracted from the metagenome (in bold), and closest *mttB* sequences in public databases. This reconstruction was performed using the PhyML algorithm. Two *mttB* reconstructed sequences were affiliated to *Methanomassiliicoccales* (bold green) while the other 11 *mttB* sequences were affiliated to other methanoarchaea (bold purple). Accession numbers are preceded by a “@”.



**Table S5.** Taxonomic assignation of the taxa non-randomly associated with *Methanomassiliicoccales* OTUs and their reported metabolic features, within the PENF substrate-amended slurry. \* the taxonomic affiliation does not allow to infer any possible metabolic characteristics; \*\* from genome annotation; ND : Not Determined;

*Peptostreptococcales-T.: Peptostreptococcales-Tissierellales ; Veillonellales-S.: Veillonellales-Selenomonadales.*

| Origin                                     | Percolation threshold | OTU source   | Weight | Targeted OTU                   | Consensus Silva138, RDP database taxonomic affiliations |                               |                                      | Representative reported to maintained (putative) partnership with methanogens | Reported metabolic products                                 | References |
|--------------------------------------------|-----------------------|--------------|--------|--------------------------------|---------------------------------------------------------|-------------------------------|--------------------------------------|-------------------------------------------------------------------------------|-------------------------------------------------------------|------------|
|                                            |                       |              |        |                                | Order                                                   | Family                        | Genus                                |                                                                               |                                                             |            |
| Culture-based incubation experiment (PENF) | 0.79                  | OTU21        | 0.96   | OTU2                           | <i>Bacteroidales</i>                                    | <i>Dysgonomonadaceae</i>      | Multi-affiliation                    | No                                                                            | Acids, acetate**                                            | [24,25]    |
|                                            |                       |              | 0.95   | OTU52                          | <i>Synergistales</i>                                    | <i>Synergistaceae</i>         | Unknown genus                        | Yes                                                                           | Short-chain fatty acids                                     | [26]       |
|                                            |                       |              | 0.95   | OTU6                           | Unknown order                                           | <i>Hungateiclostridiaceae</i> | <i>Ruminiclostridium</i>             | ND                                                                            | CO <sub>2</sub> , lactate, propionate, butyrate, and others | [27]       |
|                                            |                       |              | 0.93   | OTU90                          | <i>Synergistales</i>                                    | <i>Synergistaceae</i>         | Unknown genus                        | Yes                                                                           | Short-chain fatty acids                                     | [26]       |
|                                            |                       |              | 0.92   | OTU213                         | <i>Christensenellales</i>                               | <i>Christensenellaceae</i>    | <i>Christensenellaceae</i> R-7 group | Yes                                                                           | Acids, butyrate, H <sub>2</sub> , CO <sub>2</sub>           | [28–31]    |
|                                            |                       |              | 0.91   | OTU44                          | <i>Methanobacteriales</i>                               | <i>Methanobacteriaceae</i>    | <i>Methanobacterium</i>              | No                                                                            | CH <sub>4</sub>                                             |            |
|                                            |                       |              | 0.91   | OTU8                           | <i>Bacteroidales</i>                                    | <i>Rikenellaceae</i>          | Bact-08                              | No                                                                            | Acetate, alcohols, succinate                                | [30,32]    |
|                                            |                       |              | 0.83   | OTU521                         | <i>Peptococcales</i>                                    | <i>Peptococcaceae</i>         | Unknown genus                        | Yes                                                                           | Acetate                                                     | [33]       |
|                                            |                       | 0.83         | OTU693 | <i>Peptostreptococcales-T.</i> | <i>Anaerovoracaceae</i>                                 | <i>Anaerovorax</i>            | Yes                                  | Acetate, H <sub>2</sub> , butyrate                                            | [34]                                                        |            |
|                                            |                       | Bulk samples | 0.70   | OTU21                          | 0.73                                                    | OTU1052                       | <i>Woesearchaeales</i>               | Unknown family                                                                | Unknown genus                                               | Yes        |
| 0.73                                       | OTU2361               |              |        |                                | <i>Spirochaetales</i>                                   | <i>Spirochaetaceae</i>        | Unknown genus                        | Yes                                                                           | Acetate, H <sub>2</sub> , CO <sub>2</sub>                   | [36]       |
| 0.71                                       | OTU1174               |              |        |                                | <i>Woesearchaeales</i>                                  | Unknown family                | Unknown genus                        | Yes                                                                           | Acetate, H <sub>2</sub>                                     | [37]       |
| 0.85                                       | OTU481                |              |        | Unknown order                  | Unknown family                                          | Unknown genus                 | *                                    | *                                                                             |                                                             |            |

|              |        |         |                          |                                |                            |                                 |                            |                                           |         |
|--------------|--------|---------|--------------------------|--------------------------------|----------------------------|---------------------------------|----------------------------|-------------------------------------------|---------|
| Bulk samples | 0.83   | 0.84    | OTU360                   | Unknown order                  | Unknown family             | Unknown genus                   | *                          | *                                         |         |
|              |        | 0.80    | OTU1228                  | <i>Omnitrophales</i>           | <i>Omnitrophaceae</i>      | <i>Candidatus 'Omnitrophus'</i> | *                          | *                                         |         |
|              |        | 0.79    | OTU1624                  | <i>Desulfatiglandales</i>      | <i>Desulfatiglandaceae</i> | <i>Desulfatiglans</i>           | No                         | CO <sub>2</sub>                           | [38,39] |
|              |        | 0.77    | OTU1749                  | MSBL5                          | Unknown family             | Unknown genus                   | *                          | *                                         |         |
|              |        | 0.77    | OTU206                   | <i>Aminicenantales</i>         | Unknown family             | Unknown genus                   | Yes                        | Acetate, H <sub>2</sub> , CO <sub>2</sub> | [33]    |
|              |        | 0.73    | OTU2574                  | Napoli-4B-65                   | Unknown family             | Unknown genus                   | *                          | *                                         |         |
|              |        | 0.73    | OTU2864                  | <i>Omnitrophales</i>           | <i>Omnitrophaceae</i>      | <i>Candidatus 'Omnitrophus'</i> | *                          | *                                         |         |
|              |        | 0.72    | OTU2675                  | <i>Babeliales</i>              | Unknown family             | Unknown genus                   | No                         | ND                                        | [40]    |
|              |        | 0.71    | OTU308                   | FW22                           | Unknown family             | Unknown genus                   | *                          | *                                         |         |
|              |        | 0.70    | OTU2279                  | <i>Desulfobulbales</i>         | <i>Desulfocapsaceae</i>    | Multi-affiliation               | ND                         | ND                                        | ND      |
|              | OTU101 | 0.87    | OTU667                   | MBGD/DHVEG-1                   | Unknown family             | Unknown genus                   | *                          | *                                         |         |
|              |        | 0.85    | OTU2691                  | MBGD/DHVEG-1                   | Unknown family             | Unknown genus                   | *                          | *                                         |         |
|              |        | 0.76    | OTU2638                  | <i>Anaerolineales</i>          | <i>Anaerolineaceae</i>     | Unknown genus                   | Yes                        | Acetate                                   | [41]    |
|              |        | 0.72    | OTU21041                 | <i>Geobacterales</i>           | <i>Geobacteraceae</i>      | Multi-affiliation               | Yes                        | Acetate                                   | [33,42] |
|              |        | 0.72    | OTU2591                  | MBGD/DHVEG-1                   | Unknown family             | Unknown genus                   | *                          | *                                         |         |
|              | 0.70   | OTU2584 | <i>Veillonellales-S.</i> | <i>Sporomusaceae</i>           | Unknown genus              | Yes                             | Acetate, R-CH <sub>3</sub> | [35]                                      |         |
|              | OTU926 | 0.81    | OTU1049                  | <i>Methanomicrobiales</i>      | <i>Methanoregulaceae</i>   | <i>Methanoregula</i>            | No                         | CH <sub>4</sub>                           | [43]    |
|              |        | 0.80    | OTU2449                  | <i>Peptostreptococcales-T.</i> | <i>Anaerovoracaceae</i>    | <i>Anaerovorax</i>              | Yes                        | Acetate, H <sub>2</sub> , butyrate        | [34]    |
|              |        | 0.71    | OTU2815                  | <i>Woesearchaeales</i>         | Unknown family             | Unknown genus                   | Yes                        | Acetate, H <sub>2</sub>                   | [37]    |
|              |        | 0.71    | OTU2148                  | RBG-13-54-9                    | Unknown family             | Unknown genus                   | *                          | *                                         |         |
| 0.70         |        | OTU2706 | <i>Anaerolineales</i>    | <i>Anaerolineaceae</i>         | <i>Leptolinea</i>          | No                              | Acetate                    | [41]                                      |         |
| OTU30        | 0.85   | OTU481  | Unknown order            | Unknown family                 | Unknown genus              | *                               | *                          |                                           |         |
|              | 0.85   | OTU360  | Unknown order            | Unknown family                 | Unknown genus              |                                 |                            |                                           |         |
| OTU101       | 0.87   | OTU667  | MBGD/DHVEG-1             | Unknown family                 | Unknown genus              | *                               | *                          |                                           |         |
|              | 0.85   | OTU2691 | MBGD/DHVEG-1             | Unknown family                 | Unknown genus              | *                               | *                          |                                           |         |

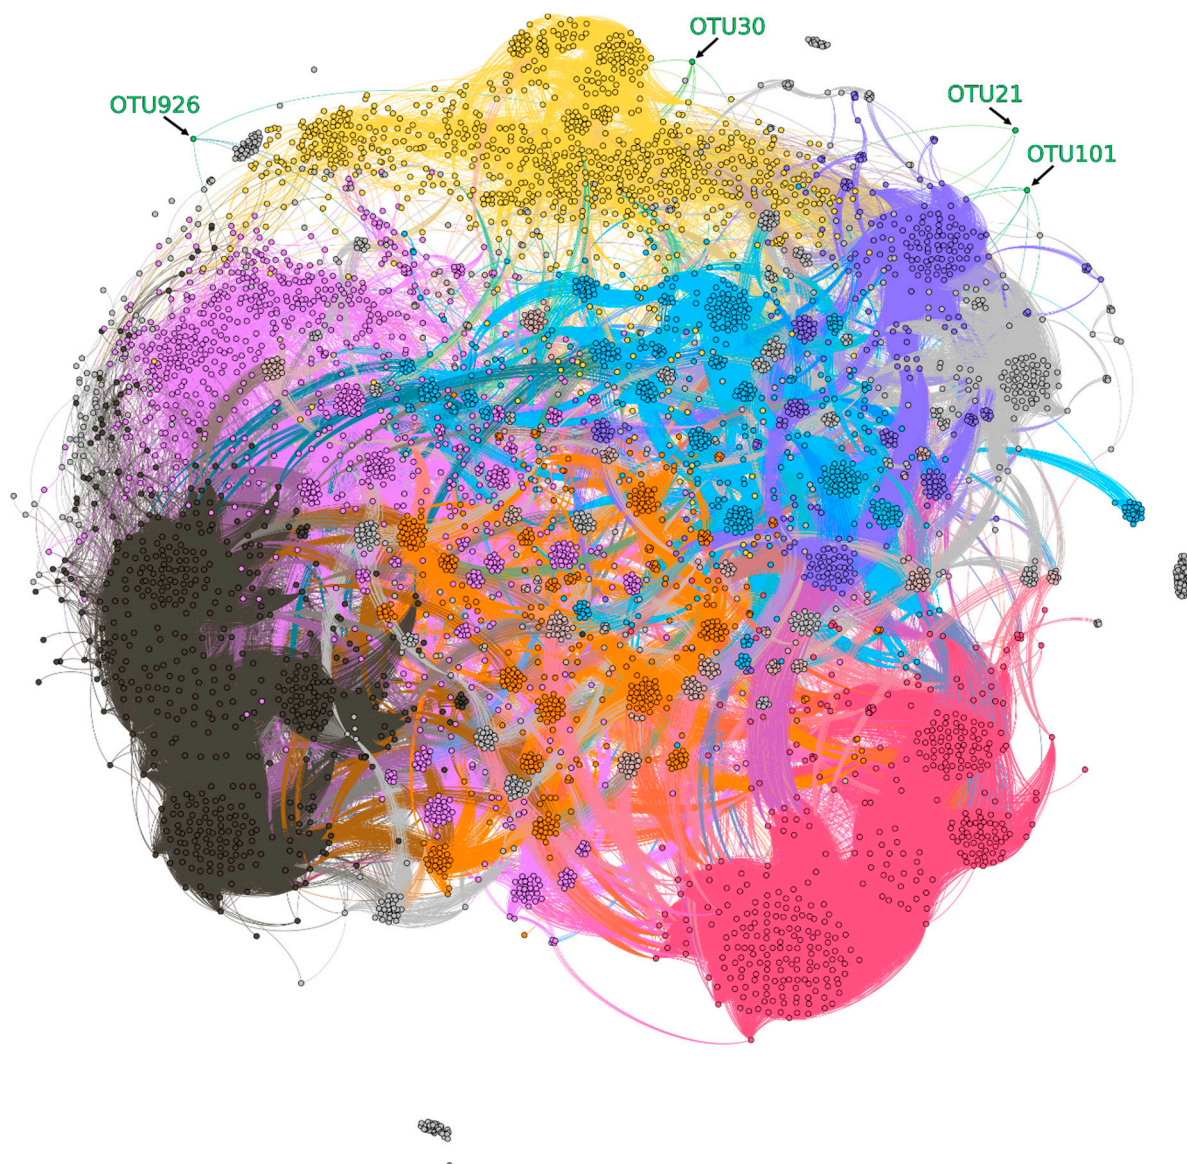

**Figure S5.** Co-occurrence network reconstructed based on 16S rRNA gene sequencing data from bulk environmental samples, based on a Spearman rank's correlation between OTUs and calculated with a percolation threshold of 0.70. Different colour nodes show different modules. *Methanomassiliicoccales* are in green.

## References

1. Mihajlovski, A.; Doré, J.; Levenez, F.; Alric, M.; Brugère, J.-F. Molecular evaluation of the human gut methanogenic archaeal microbiota reveals an age-associated increase of the diversity. *Environ. Microbiol. Rep.* **2010**, *2*, 272–280, doi:10.1111/j.1758-2229.2009.00116.x.
2. L'Haridon, S.; Chalopin, M.; Colombo, D.; Toffin, L. *Methanococcoides vulcani* sp. nov., a marine methylotrophic methanogen that uses betaine, choline and N,N-dimethylethanolamine for methanogenesis, isolated from a mud volcano, and emended description of the genus *Methanococcoides*. *Int. Syst. Evol. Micr.* **2014**, *64*, 1978–1983, doi:10.1099/ijs.0.058289-0.
3. Zillig, W.; Holz, I.; Klenk, H.-P.; Trent, J.; Wunderl, S.; Janekovic, D.; Immsel, E.; Haas, B. *Pyrococcus woesei*, sp. nov., an ultra-thermophilic marine archaeobacterium, representing a novel order, *Thermococcales*. *Syst. Appl. Microbiol.* **1987**, *9*, 62–70, doi:10.1016/S0723-2020(87)80057-7.
4. Lehours, A.-C.; Evans, P.; Bardot, C.; Joblin, K.; Gérard, F. Phylogenetic Diversity of *Archaea* and *Bacteria* in the Anoxic Zone of a Meromictic Lake (Lake Pavin, France). *Appl. Environ. Microbiol.* **2007**, *73*, 2016–2019, doi:10.1128/AEM.01490-06.
5. Yakimov, M.M.; Cono, V.L.; Spada, G.L.; Bortoluzzi, G.; Messina, E.; Smedile, F.; Arcadi, E.; Borghini, M.; Ferrer, M.; Schmitt-Kopplin, P., et al. Microbial community of the deep-sea brine Lake Kryos seawater—Brine interface is active below the chaotropy limit of life as revealed by recovery of mRNA. *Environ. Microbiol.* **2015**, *17*, 364–382, doi:10.1111/1462-2920.12587.
6. Alain, K.; Callac, N.; Ciobanu, M.-C.; Reynaud, Y.; Duthoit, F.; Jebbar, M. DNA extractions from deep subseafloor sediments: Novel cryogenic-mill-based procedure and comparison to existing protocols. *J. Microbiol. Methods* **2011**, *87*, 355–362, doi:10.1016/j.mimet.2011.09.015
7. Blankenberg, D.; Gordon, A.; Von Kuster, G.; Coraor, N.; Taylor, J.; Nekrutenko, A.; the Galaxy Team. Manipulation of FASTQ data with Galaxy. *Bioinformatics* **2010**, *26*, 1783–1785, doi:10.1093/bioinformatics/btq281.
8. Dridi, B.; Fardeau, M.-L.; Ollivier, B.; Raoult, D.; Drancourt, M. *Methanomassiliicoccus luminyensis* gen. nov., sp. nov., a methanogenic archaeon isolated from human faeces. *Int. J. Syst. Evol. Micr.* **2012**, *62*, 1902–1907, doi:10.1099/ijs.0.033712-0.
9. Iino, T.; Tamaki, H.; Tamazawa, S.; Ueno, Y.; Ohkuma, M.; Suzuki, K.; Igarashi, Y.; Haruta, S. *Candidatus Methanogranum caenicola*: A Novel Methanogen from the Anaerobic Digested Sludge, and Proposal of *Methanomassiliicocaceae* fam. nov. and *Methanomassiliicoccales* ord. nov., for a Methanogenic Lineage of the Class *Thermoplasmata*. *Microbes Environ.* **2013**, *28*, doi:10.1264/jsme2.ME12189
10. Borrel, G.; O'Toole, P.W.; Harris, H.M.B.; Peyret, P.; Brugère, J.-F.; Gribaldo, S. Phylogenomic Data Support a Seventh Order of Methylotrophic Methanogens and Provide Insights into the Evolution of Methanogenesis. *Genome Biol. Evol.* **2013**, *5*, 1769–1780, doi:10.1093/gbe/evt128.
11. Söllinger, A.; Schwab, C.; Weinmaier, T.; Loy, A.; Tveit, A.T.; Schleper, C.; Urlich, T. Phylogenetic and genomic analysis of *Methanomassiliicoccales* in wetlands and animal intestinal tracts reveals clade-specific habitat preferences. *FEMS Microbiol. Ecol.* **2016**, *92*, doi:10.1093/femsec/fiv149.
12. Borrel, G.; McCann, A.; Deane, J.; Neto, M.C.; Lynch, D.B.; Brugère, J.-F.; O'Toole, P.W. Genomics and metagenomics of trimethylamine-utilizing *Archaea* in the human gut microbiome. *ISME J.* **2017**, *11*, 2059–2074, doi:10.1038/ismej.2017.72.
13. Lang, K.; Schuldes, J.; Klingl, A.; Poehlein, A.; Daniel, R.; Brune, A. New Mode of Energy Metabolism in the Seventh Order of Methanogens as Revealed by Comparative Genome Analysis of “*Candidatus Methanoplasma termitum*.” *Appl. Environ. Microbiol.* **2015**, *81*, 1338–1352, doi:10.1128/AEM.03389-14.
14. Borrel, G.; Parisot, N.; Harris, H.M.; Peyretailade, E.; Gaci, N.; Tottey, W.; Bardot, O.; Raymann, K.; Gribaldo, S.; Peyret, P.; et al. Comparative genomics highlights the unique biology of *Methanomassiliicoccales*, a *Thermoplasmatales*-related seventh order of methanogenic archaea that encodes pyrrolysine. *BMC Genom.* **2014**, *15*, 679, doi:10.1186/1471-2164-15-679.
15. Zinke, L.A.; Evans, P.N.; Schroeder, A.L.; Parks, D.H.; Varner, R.K.; Rich, V.I.; Tyson, G.W.; Emerson, J.B. Evidence for non-methanogenic metabolisms in globally distributed archaeal clades basal to the *Methanomassiliicoccales*. *Environ. Microbiol.* **2020**, n/a, doi:10.1101/2020.03.09.984617.
16. Gascuel, O. BIONJ: An improved version of the NJ algorithm based on a simple model of sequence data. *Mol. Biol. Evol.* **1997**, *14*, 685–695, doi:10.1093/oxfordjournals.molbev.a025808.
17. Kröninger, L.; Berger, S.; Welte, C.; Deppenmeier, U. Evidence for the involvement of two heterodisulfide reductases in the energy-conserving system of *Methanomassiliicoccus luminyensis*. *FEBS J.* **2016**, *283*, 472–483, doi:10.1111/febs.13594.
18. Kemnitz, D.; Kolb, S.; Conrad, R. Phenotypic characterization of Rice Cluster III archaea without prior isolation by applying quantitative polymerase chain reaction to an enrichment culture. *Environ. Microbiol.* **2005**, *7*, 553–565, doi:10.1111/j.1462-2920.2005.00723.x.
19. Kröninger, L.; Gottschling, J.; Deppenmeier, U. Growth Characteristics of *Methanomassiliicoccus luminyensis* and expression of methyltransferase encoding genes. *Archaea* **2017**, 2756573, doi:10.1155/2017/2756573
20. Mah, R.A.; Smith, M.R.; Baresi, L. Studies on an acetate-fermenting strain of *Methanosarcina*. *Appl. Environ. Microbiol.* **1978**, *35*, 1174–1184.
21. Webster, G.; Rinna, J.; Roussel, E.G.; Fry, J.C.; Weightman, A.J.; Parkes, R.J. Prokaryotic functional diversity in different biogeochemical depth zones in tidal sediments of the Severn Estuary, UK, revealed by stable-isotope probing. *FEMS Microbiol. Ecol.* **2010**, *72*, 179–197, doi:10.1111/j.1574-6941.2010.00848.x.
22. Ciobanu, M.-C.; Rabineau, M.; Droz, L.; Révillon, S.; Ghiglione, J.-F.; Dennielou, B.; Jorry, S.-J.; Kallmeyer, J.; Etoubleau, J.; Pignet, P.; et al. Sedimentological imprint on subseafloor microbial communities in Western Mediterranean Sea Quaternary sediments. *Biogeosciences* **2012**, *9*, 3491–3512, doi:10.5194/bg-9-3491-2012.

23. Pierre, C.; Blanc-Valleron, M.-M.; Demange, J.; Boudouma, O.; Foucher, J.-P.; Pape, T.; Himmler, T.; Fekete, N.; Spiess, V. Authigenic carbonates from active methane seeps offshore southwest Africa. *Geo Mar. Lett.* **2012**, *32*, 501–513, doi:10.1007/s00367-012-0295-x.
24. Murakami, T.; Segawa, T.; Takeuchi, N.; Sepúlveda, G.B.; Labarca, P.; Kohshima, S.; Hongoh, Y. Metagenomic analyses highlight the symbiotic association between the glacier stonefly *Andiperla willinki* and its bacterial gut community. *Environ. Microbiol.* **2018**, *20*, 4170–4183, doi:10.1111/1462-2920.14420.
25. Olsen, I. *Dysgonomonas*. In *Bergey's Manual of Systematics of Archaea and Bacteria*; John Wiley & Sons, Inc: Hoboken, NJ, USA, 2015; pp. 1–8, ISBN 978-1-118-96060-8, doi:10.1002/9781118960608.gbm00243.
26. Vartoukian, S.R.; Palmer, R.M.; Wade, W.G. The division “*Synergistes*.” *Anaerobe* **2007**, *13*, 99–106, doi:10.1016/j.anaerobe.2007.05.004.
27. Yutin, N.; Galperin, M.Y. A genomic update on clostridial phylogeny: Gram-Negative spore formers and other misplaced clostridia. *Environ. Microbiol.* **2013**, *15*, 2631–2641, doi:10.1111/1462-2920.12173.
28. Goodrich, J.K.; Waters, J.L.; Poole, A.C.; Sutter, J.L.; Koren, O.; Blekhman, R.; Beaumont, M.; Van Treuren, W.; Knight, R.; Bell, J.T.; et al. Human Genetics Shape the Gut Microbiome. *Cell* **2014**, *159*, 789–799, doi:10.1016/j.cell.2014.09.053.
29. Morotomi, M.; Nagai, F.; Watanabe, Y. Description of *Christensenella minuta* gen. nov., sp. nov., isolated from human faeces, which forms a distinct branch in the order *Clostridiales*, and proposal of *Christensenellaceae* fam. nov. *Int. J. Syst. Evol. Microbiol.* **2012**, *62*, 144–149, doi:10.1099/ijs.0.026989-0.
30. Lee, J.; Koo, T.; Yulisa, A.; Hwang, S. Magnetite as an enhancer in methanogenic degradation of volatile fatty acids under ammonia-stressed condition. *J. Environ. Manag.* **2019**, *241*, 418–426, doi:10.1016/j.jenvman.2019.04.038.
31. Waters, J.L.; Ley, R.E. The human gut bacteria *Christensenellaceae* are widespread, heritable, and associated with health. *BMC Biol.* **2019**, *17*, 83, doi:10.1186/s12915-019-0699-4.
32. Graf, J. The Family *Rikenellaceae*. In *The Prokaryotes: Other Major Lineages of Bacteria and The Archaea*; Rosenberg, E., DeLong, E.F., Lory, S., Stackebrandt, E., Thompson, F., Eds.; Springer: Berlin/Heidelberg, Germany, 2014; pp. 857–859, ISBN 978-3-642-38954-2, doi:10.1007/978-3-642-38954-2\_134.
33. Liu, P.; Klose, M.; Conrad, R. Temperature effects on structure and function of the methanogenic microbial communities in two paddy soils and one desert soil. *Soil Biol. Biochem.* **2018**, *124*, 236–244, doi:10.1016/j.soilbio.2018.06.024.
34. Schink, B. *Anaerovorax*. In *Bergey's Manual of Systematics of Archaea and Bacteria*; John Wiley & Sons, Inc: Hoboken, NJ, USA, 2015; pp. 1–3, ISBN 978-1-118-96060-8, doi:10.1002/9781118960608.gbm00725.
35. Drake, H.L.; Gössner, A.S. *Sporomusa*. In *Bergey's Manual of Systematics of Archaea and Bacteria*; John Wiley & Sons, Inc: Hoboken, NJ, USA, 2015; pp. 1–7, ISBN 978-1-118-96060-8, doi:10.1002/9781118960608.gbm00706.
36. Fowler, S.J.; Dong, X.; Sensen, C.W.; Suflita, J.M.; Gieg, L.M. Methanogenic toluene metabolism: Community structure and intermediates. *Environ. Microbiol.* **2012**, *14*, 754–764, doi:10.1111/j.1462-2920.2011.02631.x.
37. Liu, X.; Li, M.; Castelle, C.J.; Probst, A.J.; Zhou, Z.; Pan, J.; Liu, Y.; Banfield, J.F.; Gu, J.-D. Insights into the ecology, evolution, and metabolism of the widespread *Woesearchaeotal* lineages. *Microbiome* **2018**, *6*, 102, doi:10.1186/s40168-018-0488-2.
38. Suzuki, D.; Li, Z.; Cui, X.; Zhang, C.; Katayama, A. Reclassification of *Desulfobacterium anilini* as *Desulfatiglans anilini* comb. nov. within *Desulfatiglans* gen. nov., and description of a 4-chlorophenol-degrading sulfate-reducing bacterium, *Desulfatiglans parachlorophenolica* sp. nov. *Int. J. Syst. Evol. Microbiol.* **2014**, *64*, 3081–3086, doi:10.1099/ijs.0.064360-0.
39. Galushko, A.; Kuever, J. *Desulfatiglans*. In *Bergey's Manual of Systematics of Archaea and Bacteria*; John Wiley & Sons, Inc: Hoboken, NJ, USA, 2019; pp. 1–4, ISBN 978-1-118-96060-8, doi:10.1002/9781118960608.gbm01679.
40. Deeg, C.M.; Zimmer, M.M.; George, E.E.; Husnik, F.; Keeling, P.J.; Suttle, C.A. *Chromulinavorax destructans*, a pathogen of microzooplankton that provides a window into the enigmatic candidate phylum Dependistia. *PLoS Pathog.* **2019**, *15*, e1007801, doi:10.1371/journal.ppat.1007801.
41. Snell-Castro, R.; Méndez-Acosta, H.O.; Arreola-Vargas, J.; González-Álvarez, V.; Pintado-González, M.; González-Morales, M.T.; Godon, J.J. Active prokaryotic population dynamics exhibit high correlation to reactor performance during methane production from acid hydrolysates of *Agave tequilana* var. *azul* bagasse. *J. Appl. Microbiol.* **2019**, *126*, 1618–1630, doi:10.1111/jam.14234.
42. Zhang, S.; Chang, J.; Lin, C.; Pan, Y.; Cui, K.; Zhang, X.; Liang, P.; Huang, X. Enhancement of methanogenesis via direct interspecies electron transfer between *Geobacteraceae* and *Methanosaetaceae* conducted by granular activated carbon. *Bioresour. Technol.* **2017**, *245*, 132–137, doi:10.1016/j.biortech.2017.08.111.
43. Zinder, S.; Bräuer, S. *Methanoregula*. In *Bergey's Manual of Systematics of Archaea and Bacteria*; John Wiley & Sons, Inc: Hoboken, NJ, USA, 2016; pp. 1–8, ISBN 978-1-118-96060-8, doi:10.1002/9781118960608.gbm01368
